# Supplementary material
Source: publisher figshare collection journal article supplement (https://brill.figshare.com/ndownloader/files/37937091)
Supplement: Supplementary file 1 [file 37937091]

## Sheet: IPD
Table A6.
id	M1	M2	M3	M4	M5	M6	M7	M8	M9	M10	M11	M12	M13	M14	M15	M16	M17	M18	M19	M20	M21	M22	M23	M24	M25	M26	M27	M28	M29	M30	M31	M32
D_abrahamii_KAD0058	7.5	7.5	7.5	10	10	7.5	7.5	10	7.5	7.5	7.5	10	7.5	7.5	7.5	7.5	7.5	10	7.5	10	7.5	10	10	7.5	10	10	7.5	10	7.5	8.75
D_abrahamii_KAD0059	7.5	7.5	7.5	7.5	7.5	7.5	7.5	10	7.5	10	10	7.5	7.5	7.5	7.5	7.5	10	7.5	7.5	7.5	7.5	10	7.5	7.5	5	5	7.5	7.5	5	5
D_abrahamii_KAD0060	7.5	7.5	10	10	10	10	10	7.5	10	10	10	10	10	7.5	10	10	10	10	7.5	7.5	7.5	7.5	7.5	7.5	7.5	7.5	5	5	7.5	7.5
D_abrahamii_RBE2765	8	8	8	7	7	8	6	10	9	9	10	10	10	10	8	9	8	6	6	7	6	7	8	10	8	7	8	7	7.5	7.5
D_abrahamii_RRN0033	10	7.5	7.5	7.5	7.5	7.5	7.5	7.5	10	7.5	7.5	7.5	7.5	7.5	10	7.5	7.5	7.5	7.5	7.5	5	5	7.5	7.5	7.5	7.5	7.5	7.5	7.5	7.5
D_abrahamii_RRN0034	7.5	7.5	7.5	6.25	7.5	8.75	7.5	7.5	7.5	15	10	7.5	7.5	7.5	7.5	7.5	7.5	6.25	7.5	6.25	7.5	6.25	7.5	5	6.25	7.5	7.5	10	6	8
D_abrahamii_SH0681	10	10	10	10	7.5	7.5	7.5	7.5	7.5	5	5	5	5	5	7.5	10	7.5	5	5	5	5	10	5	5	5	5	5	7.5	7.5	7.5
D_baronii_RBE2254	7.5	7.5	7.5	7.5	5	10	5	5	7.5	5	10	10	10	5	7.5	5	5	5	5	10	7.5	7.5	5	5	7.5	7.5	5	5	7.5	10
D_baronii_RBE2257	10	10	7.5	7.5	7.5	7.5	7.5	7.5	7.5	7.5	7.5	7.5	7.5	7.5	7.5	7.5	7.5	7.5	7.5	5	7.5	7.5	7.5	7.5	7.5	7.5	7.5	7.5	7.5	10
D_baronii_RBE2469	7.5	7.5	5	7.5	7.5	7.5	7.5	7.5	12.5	7.5	7.5	7.5	7.5	7.5	7.5	7.5	5	7.5	7.5	10	7.5	7.5	10	7.5	7.5	7.5	7.5	7.5	5.5	6.5
D_baronii_RBE2624	5	5.5	5	5	4.5	4	5.5	6	4.5	5	6	6	7	8	6	7	6.5	6	5.5	7	4.5	5	5.5	6	5.5	4.5	6	5
D_baronii_RNH1177	7.5	5	7.5	6.25	5	8.75	5	5	6.25	5	7.5	5	3.75	5	5	7.5	7.5	5	5	5	5	6.25	5	7.5	6.25	5	5	3.75	5	7.5
D_bathiei_KAD0143	6.25	7.5	6.25	5	7.5	7.5	5	6.25	5	3.75	7.5	6.25	7.5	5	6.25	5	5	2.5	5	6.25	5	7.5	6.25	5	6.25	7.5	3.75	7.5	6.25	7.5
D_bathiei_KAD0147	7.5	8.75	7.5	5	6.25	7.5	8.75	7.5	7.5	6.25	6.25	6.25	5	5	6.25	7.5	3.75	5	3.75	6.25	7.5	5	5	5	6.25	6.25	7.5	5	2.5	5
D_bathiei_KAD0150	5	3.75	5	5	5	3.75	6.25	6.25	7.5	7.5	6.25	7.5	3.75	5	2.5	3.75	7.5	5	5	3.75	7.5	7.5	6.25	7.5	6.25	5	3.75	2.5	3.75	5
D_bathiei_KAD0153	7.5	6.25	3.75	5	5	6.25	7.5	6.25	5	6.25	7.5	7.5	5	2.5	3.75	3.75	5	5	3.75	7.5	7.5	6.25	7.5	6.25	6.25	5	7.5	5	6.25	7.5
D_bathiei_RAV0097	11	9	10	9	11	8	9	10	11	10	12	11	10	8	10	10	10	9	9	7	10	10	10	9	10	10	10	9	12	12
D_chlorocarpa_CR7390	6.25	6.25	7.5	6.25	7.5	5	5	5	3.75	5	5	7.5	3.75	6.25	7.5	6.25	6.25	7.5	5	5	5	6.25	6.25	7.5	2.5	3.75	7.5	7.5	7.5	7
D_chlorocarpa_CR7422	8	7	9	8	9	10	11	13	11	8	8	7	8	10	10	9	7	10	10	9	9	7	7	8	9	9	10	10	7.5	6.25
D_chlorocarpa_RIR2903	7	8	7	6.5	7	4	7.5	6	9.5	6.5	9	8	9.5	9	8	9	8.5	10	8	6.5	7	7.5	4.5	6.5	7.5	7	4	6.5	8.5	8
D_chlorocarpa_RIR2904	8	6	8.5	7.5	8.5	7.5	8.5	8.5	6	7	7	7.5	7	8.5	7	6	7	8	7.5	8.5	9.5	8	8.5	8	7.5	8	8	9.5	7.5	5
D_chlorocarpa_SH0741	7.5	7.5	10	7.5	10	7.5	10	10	10	7.5	10	7.5	7.5	7.5	5	7.5	5	5	5	5	7.5	7.5	7.5	7.5	7.5	5	7.5	7.5	5	7.5
D_davidii_RIR3351	7.5	6.25	3.75	7.5	5	6.25	3.75	7.5	6.25	7.5	5	6.25	5	7.5	2.5	7.5	6.25	7.5	7.5	5	6.25	5	7.5	5	5	7.5	3.75	5	5	7.5
D_davidii_RIR3352	7.5	2.5	3.75	5	7.5	5	2.5	3.75	6.25	7.5	3.75	2.5	7.5	5	2.5	3.75	7.5	3.75	5	5	2.5	3.75	7.5	5	5	5	3.75	6.25	9	9
D_davidii_RIR3353	3.75	3.75	3.75	3.75	5	5	3.75	3.75	7.5	3.75	3.75	5	5	6.25	7.5	6.25	7.5	6.25	7.5	5	6.25	5	5	5	3.75	3.75	5	3.75	5	3.75
D_davidii_RIR3571	7.5	6.25	7.5	5	5	6.25	5	5	7.5	5	6.25	3.75	7.5	5	5	5	7.5	5	5	5	2.5	5	6.25	5	3.75	2.5	5	5	5	2.5	3.75
D_davidii_SH0733	7.5	6.25	7.5	6.25	5	5	5	3.75	7.5	5	5	5	6.25	7.5	5	7.5	7.5	5	6.25	5	5	7.5	5	6.25	7.5	6.25	7.5	2.5	5	2.5
D_greveana_RIR2421	7	7.5	5.5	6	6.5	6	5.5	6.5	5.5	7	5	6	6.5	6	6	5	6.5	7	6	7	6.5	6	7	7	6	7.5	6	6	5.5	7
D_greveana_RIR2913	8.5	8.5	7.5	7	6.5	7	8.5	7.5	6.5	7	6	7.5	7.5	7.5	7.5	8	6.5	8.5	7.5	6.5	7.5	7	8.5	8	7.5	8.5	7	7	7.5	6.5	8.5	7.5
D_greveana_RIR2914	7.5	6.25	5	5	5	6	7.5	7.5	6.25	5	7	7.5	7.5	9	6.5	5	5	5	7.5	7.5	9.5	6.5	6.5	7.5	9.5	7.5	5	7.5	8.5	7.5	7.5	8
D_greveana_RIR2915	7	7	6.5	9	6.5	7.5	6.5	7	7	7	7	7	6.5	6.5	7	6.5	7.5	7.5	5.5	6.5	7.5	7.5	7.5	7	6	7	7	7	7.5	8	8	6.5
D_greveana_RIR3214	6.5	5.5	6	7	7	6.5	6.5	7	6.5	5.5	6.5	5.5	6.5	5.5	6	5.5	6	6	6	6	6	6	5	5.5	6	6.5	6.5	6	6	6
D_greveana_RIR3215	6	7.5	6	7.5	7.5	7	6.5	6.5	7.5	6.5	6.5	6.5	6.5	6.5	7	7	6	6.5	6.5	7	6.5	5.5	6.5	6.5	6	6	6	5.5	5.5	6.5
D_greveana_RIR3219	7	6.5	5	5.5	6.5	7	7	7.5	6.5	6.5	6.5	5	5.5	6	5.5	6.5	5.5	6	6	5.5	7	6.5	6.5	7	6	6.5	6.5	6.5	6.5	7.5
D_greveana_SH0750	7.5	7.5	5	7.5	5	5	7.5	5	5	5	7.5	7.5	7.5	5	5	5	5	5	5	7.5	7.5	5	5	5	5	7.5	5	5	5	7.5	7.5
D_oronjiae_ANS0012	6.25	5	5	7.5	6.25	3.75	5	7.5	6.25	6.25	7.5	2.5	3.75	2.5	5	7.5	2.5	7.5	2.5	3.75	5	5	6.25	5	3.75	5	7.5	5	7.5
D_oronjiae_ANS0024	3.75	5	7.5	5	6.25	7.5	6.25	7.5	3.75	5	7.5	3.75	5	6.25	7.5	5	5	6.25	5	7.5	6.25	3.75	2.5	3.75	2.5	5	3.75	6.25	7.5
D_oronjiae_ANS0026	7.5	7.5	6.25	7.5	6.25	5	5	6.25	7.5	7.5	6.25	7.5	7.5	7.5	6.25	8.75	7.5	7.5	8.75	5	3.75	5	5	3.75	6.25	5	3.75	7.5	6.25	5
D_oronjiae_ANS0028	7.5	7.5	7.5	7.5	7.5	7.5	7.5	7.5	7.5	7.5	7.5	7.5	7.5	7.5	7.5	7.5	7.5	5	7.5	7.5	7.5	7.5	7.5	7.5	7.5	7.5	7.5	7.5
D_oronjiae_KAD0052	5	5	7.5	7.5	7.5	10	7.5	5	10	5	10	5	5	10	5	7.5	5	7.5	10	5	10	5	7.5	5	7.5	7.5	7.5	7.5	10
D_oronjiae_SH0690	5	5	5	7.5	7.5	7.5	7.5	5	5	7.5	5	5	7.5	5	5	5	5	5	5	5	5	5	5	5	5	7.5	7.5	5	5
D_lemurica_CR6514	7.5	12.5	7.5	7.5	10	12.5	10	10	10	10	7.5	7.5	7.5	10	10	10	7.5	12.5	7.5	7.5	10	12.5	12.5	10	10	10	10	10	10	10
D_lemurica_CR6519	10	10	8	7	8	7	7	6	6	5.5	8	7.5	8	6	9	8	8	9	7	8	8	6	7	7	8	7.5	7	8	7	7
D_lemurica_CR7441	7.5	5	6.25	5	5	7.5	5	5	5	6.25	3.75	7.5	5	5	7.5	6.25	5	5	7.5	6.25	5	5	3.75	5	7.5	5	3.75	5	7.5	6.25
D_lemurica_RIR3384	10	10	11	12.5	12.5	10	10	12.5	13	10	12.5	10	11	11	12.5	10	11	10	12.5	12.5	13	15	12.5	12.5	11	10	15	12.5	12.5	13
D_lemurica_RIR3387	12	12	11.5	12	12	10	12	10	12.5	11	12	10	11	12	12.5	11.5	11	12	10	10	10	11	12.5	10	12	9	10	12	10	9
D_lemurica_RIR3388	6	5	5.5	8	10	10	9	8	8	8	10	9	8	8	7	10	8	7	8	6	7	8	11	10	10	9	9	10	9	10
D_lemurica_RIR3419	15	12	12	12	12.5	12.5	12.5	10	10	12.5	12	12.5	10	10	12.5	11.5	15	15	10	12.5	12.5	15	12.5	11	10	12.5	12.5	12.5	12.5	15
D_lemurica_RIR3420	10.5	12.5	12.5	12.5	12.5	12.5	10.5	10	10.5	12.5	12.5	11	11	12.5	10	10	10	9	10	12.5	10	8	8	10	8	10	10	9	8	10
D_monticola_KAD0066	8	7.5	8	7.5	7.5	8	7	7.5	7.5	7	7	7.5	7.5	7.5	7.5	7.5	6.5	7.5	7.5	6.5	7	7.5	6.5	7	7	7	8	6.5	7	7	5.5	7.5
D_monticola_KAD0069	8.5	8.5	7.5	8.5	7.5	7.5	7.5	7.5	7.5	8	7.5	7.5	6.5	6.5	7.5	7	8	7	7	6.5	7	7.5	7	6.5	6	5.5	6	7.5	6	7.5	6.5	6.5
D_monticola_KAD0089	6	5.5	6	6.5	6.5	6.5	6	6	6.5	6	6	6.5	7	7	6.5	6.5	6.5	6.5	6	6.5	7	6	6	6.5	5.5	6	6	5.5	6	7	6	5.5
D_monticola_KAD0092	5.5	5	5	5	5.5	5	5	5.5	6	6.5	5	5.5	6.5	6	5.5	5.5	6.5	5.5	6.5	5.5	6	6.5	5.5	5	5.5	6	5.5	5.5	5	5.5	5.5	5
D_monticola_KAD0094	7	7	7.5	8.5	7	7.5	7.5	7.5	7.5	7.5	7.5	8.5	7.5	7.5	8	8.5	6.5	8	8	7	7.5	7	7.5	8	7.5	7.5	7.5	8	7.5	8	8.5	8
D_normandii_RBE2486	6.25	7.5	8.75	6.25	7.5	5	7.5	7.5	6.25	8.75	7.5	7.5	7.5	10	7.5	6.25	10	8.75	7.5	7.5	6.25	10	7.5	8.75	10	7.5	10	7.5	7.5	10
D_normandii_RBE2614	10	7.5	12.5	7.5	7.5	7.5	12.5	7.5	7.5	7.5	7.5	10	7.5	10	7.5	10	7.5	12.5	5	7.5	7.5	7.5	7.5	7.5	10	10	7.5	10	10	10
D_normandii_RZK8223	6	7	7	7	7	9	8	6	6	7	8	8	7	8	6	6	7	8	8	8	8	10	9	8	8	8	7	7
D_normandii_RZK8224	5	5	5	7.5	7.5	5	7.5	7.5	10	7.5	7.5	10	7.5	10	10	7.5	7.5	10	7.5	10	10	7.5	7.5	10	10	12.5	10	10	10	10
D_normandii_RZK8375	5	6.25	7.5	6.25	7.5	6.25	5	6.25	8.75	5	3.75	6.25	3.75	3.75	5	3.75	5	6.25	5	5	6.25	10	7.5	7.5	10	8.75	5	7.5	7.5	7.5
D_obtusa_RIR2441	7.5	7.5	7.5	7.5	7.5	7.5	7.5	5	7.5	7.5	7.5	5	5	5	5	5	5	5	5	5	5	5	7.5	7.5	7.5	5	7.5	7.5	5	7.5
D_obtusa_RIR2447	5	5	5	5	5	5	5	5	5	5	5	5	5	5	7.5	7.5	7.5	7.5	7.5	7.5	7.5	7.5	5	5	7.5	5	7.5	7.5	10	10
D_obtusa_RIR2834	7.5	7.5	7.5	8.75	7.5	7.5	7.5	7.5	6.25	6.25	10	7.5	5	5	6.25	5	6.25	7.5	8.75	10	10	10	7.5	7.5	7.5	6.25	6.25	5	7.5	7.5
D_obtusa_RIR2835	7.5	7.5	7.5	10	8.75	8.75	7.5	7.5	5	7.5	7.5	7.5	7.5	7.5	7.5	7.5	7.5	8.75	7.5	7.5	7.5	7.5	7.5	6.25	7.5	7.5	7.5	7.5	6.25	6.25
D_obtusa_RIR2842	7.5	7.5	7.5	7.5	10	6.25	7.5	7.5	10	8.75	10	7.5	10	8.75	7.5	10	8.75	7.5	5	7.5	7.5	8.75	10	7.5	8.75	7.5	7.5	7.5	5	6.25
D_orientalis_KAD0200	8	8	8	10	9	8.5	8	8	8	8	7.5	9	9	6	5	6	7	10	9	9	10	10	10	6	9	8	7	10	10	9.5
D_orientalis_RFN0021	5	5	5	5	5	7.5	5	5	5	5	5	5	5	2.5	5	5	5	5	7.5	5	5	5	10	5	7.5	7.5	10	7.5	10	5
D_orientalis_RFN0035	5	7.5	7.5	10	7.5	5	5	7.5	5	5	7.5	5	5	7.5	5	7.5	7.5	7.5	7.5	5	5	5	5	7.5	10	5	5	5	7.5	5
D_orientalis_RZK8269	5	5	5	5	5	7.5	5	5	7.5	5	5	7.5	5	10	10	10	5	5	7.5	5	5	7.5	5	5	5	5	5	5	7.5	10
D_orientalis_SAN0028	7.5	5	5	5	5	5	7.5	5	10	5	5	7.5	5	5	10	7.5	5	5	5	6.5	5.5	5	5	5	5	7.5	10	7.5	5	10
D_orientalis_SAN0031	5	5.5	5	5	2.5	3.5	5	5	4	5	8	10	5	7.5	7.5	5	5	5	6	5	5	5	5	5	2.5	3.5	5	3.5	4.5	4
D_pseudobaronii_ALR2439	5	3.75	5	6.25	5	6.25	5	2.5	3.75	5	7.5	5	6.25	7.5	7.5	5	6.25	8.75	6.25	5	6.25	7.5	6.25	5	3.75	5	5	6.25	7.5	2.5
D_pseudobaronii_ALR2440	7.5	7.5	5	6.25	5	7.5	7.5	5	6.25	7.5	5	2.5	7.5	5	5	6.25	5	6.25	5	3.75	5	6.25	5	2.5	5	7.5	5	6.25	5	7.5
D_pseudobaronii_ALR2446	10	7.5	10	7.5	10	7.5	7.5	7.5	7.5	7.5	7.5	7.5	7.5	7.5	5	5	7.5	7.5	7.5	10	7.5	7.5	7.5	5	5	5	5	5	10	7.5
D_pseudobaronii_RRN0026	5	5.25	5	3.75	5	3.75	2.5	2.5	3.75	5	5	6.25	3.75	5	5	6.25	6.25	5	2.5	2.5	5	5.75	5	3.75	2.5	3.75	2.5	3.75	5	2.5
D_pseudobaronii_RRN0027	7.5	6.25	2.5	5	3.75	5	2.5	6.25	7.5	5	5	3.75	6.25	5	5	6.25	3.75	5	5	6.25	6.25	3.75	5	7.5	5	6.25	5	2.5	5	25
D_purpurascens_RIR2410	7.5	5	5	5	5	5	5	5	5	5	5	5	5	5	7.5	5	5	5	5	5	5	5	5	5	5	5	5	5	5	5
D_purpurascens_RIR3335	10	7.5	7.5	7.5	10	8.75	7.5	10	10	7.5	7.5	5	8.75	7.5	8.75	10	7.5	8.75	10	7.5	7.5	6.25	7.5	7.5	6.25	7.5	7.5	10	10	6.25
D_purpurascens_RIR3336	7.5	7.5	6.25	7.5	7.5	5	5	6.25	6.25	7.5	7.5	6.25	6.25	5	5	5	5	6.25	7.5	3.75	5	5	5	5	7.5	5	5	7.5	5	8.75
D_purpurascens_RIR3337	6.25	7.5	6.25	6.25	7.5	7.5	7.5	7.5	7.5	7.5	6.25	6.25	7.5	7.5	7.5	5	7.5	7.5	6.25	10	8.75	7.5	7.5	7.5	7.5	7.5	7.5	6.25	5	5
D_purpurascens_ROZ0023	7.5	7.5	8.75	5	6.25	7.5	7.5	7.5	7.5	5	6.25	5	6.25	5	5	6.25	5	5	5	10	7.5	5	5	7.5	6.25	6.25	7.5	10	7.5	6.25
D_purpurascens_ROZ0024	7.5	7.5	7.5	5	6.25	7.5	5	5	5	6.25	5	5	6.25	6.25	6.25	7.5	8.75	7.5	5	6.25	7.5	7.5	7.5	7.5	6.25	5	5	7.5	7.5	7.5
D_razakamalalae_EME0023	5	7.5	5	5	5	7.5	5	5	7.5	5	5	5	5	7.5	5	5	7.5	5	5	7.5	5	5	5	5	7.5	7.5	5	5	5	5
D_razakamalalae_RFN0001	7.5	6.25	5	7.5	7.5	7.5	5	7.5	7.5	7.5	6.25	5	7.5	7.5	5	10	10	7.5	7.5	6.25	5	5	5	5	5	5	5	7.5	6.25
D_razakamalalae_RZK8035	15	16.25	15	17.5	16.25	12.5	17.5	20	15	15	15	16.25	12.5	20	16.25	20	17.5	11.25	11.25	15	13.75	15	16.25	16.25	17.5	20	12.5	13.75	15	12.5
D_razakamalalae_RZK8040	11.25	10	10	10	8.75	10	7.5	7.5	10	10	10	8.75	12.5	11.25	12.5	11.25	10	10	7.5	7.5	8.75	6.25	7.5	7.5	7.5	6.25	7.5	10	10	8.75
D_razakamalalae_SAN0023	7.5	7.5	5	3.75	6.25	7.5	6.25	5	7.5	3.75	5	7.5	6.25	7.5	6.25	5	2.5	6.25	6.25	5	7.5	7.5	5	5	6.25	7.5	6.25	6.25	5	7.5
D_razakamalalae_SAN0026	5	5	5	6.25	7.5	5	5	7.5	6.25	7.5	5	5	5	7.5	5	6.25	5	7.5	5	5	5	7.5	6.25	5	3.75	5	7.5	6.25	5	5
D_razakamalalae_SFR0255	8.75	10	7.5	8.75	8.75	7.5	7.5	8.75	8.75	7.5	8.75	8.75	7.5	7.5	7.5	7.5	7.5	7.5	6.25	7.5	7.5	6.25	7.5	7.5	8.75	7.5	7.5	7.5	8.75	7.5
D_urschii_ALR2443	7.5	10	10	10	7.5	7.5	10	7.5	7.5	7.5	10	7.5	10	7.5	7.5	7.5	7.5	10	7.5	7.5	7.5	5	7.5	7.5	7.5	7.5	7.5	7.5	10	7.5
D_urschii_RIR2458	7.5	7.5	7.5	5	7.5	7.5	7.5	7.5	7.5	7.5	7.5	5	7.5	5	7.5	7.5	5	5	5	5	7.5	7.5	7.5	7.5	7.5	5	7.5	7.5	7.5	7.5
D_urschii_RRN0043	7.5	7.5	7.5	6.25	7.5	8.75	7.5	7.5	7.5	15	10	7.5	7.5	7.5	7.5	7.5	7.5	6.25	7.5	6.25	7.5	6.25	7.5	5	6.25	7.5	7.5	10	7.5	8.75
D_urschii_RRN0044	7.5	5	10	7.5	5	5	5	7.5	7.5	7.5	5	6.25	5	5	5	5	5	5	5	5	6.25	6.25	5	7.5	7.5	7.5	6.25	5	5	5
D_urschii_RRN0045	5	5	5	5	6.25	5	6.25	5	5	5	5	7.5	5	5	5	5	5	7.5	7.5	5	7.5	5	5	7.5	7.5	7.5	7.5	7.5	6.25

## Sheet: VD
id	M1	M2	M3	M4	M5	M6	M7	M8	M9	M10	M11	M12	M13	M14	M15	M16	M17	M18	M19	M20	M21	M22	M23	M24	M25	M26	M27	M28	M29	M30	M31	M32	M33	M34	M35	M36	M37	M38	M39	M40	M41	M42	M43	M44	M45	M46	M47	M48	M49
D_abrahamii_KAD0058	6	5	5	6	7	8	15	18	5	5	5	3	5	6	7	5	6	4	5	5	5	5	5	5	7	6	4	5	10	2
D_abrahamii_KAD0059	10	10	16	9	9	6	12	19	8	4	6	8	9	7	5	7	7	5	6	4	7	6	9	7	11	9	12	9	8	4
D_abrahamii_KAD0060	17	12	11	18	20	15	15	12	14	20	21	14	13	17	17	18	20	19	24	24	24	21	14	11	22	23	24	24	14	8	4	7	1	3	12	7	8	7	8	6	6	5	3	6	4	7	7	6	6
D_abrahamii_RBE2765	13	12	18	14	10	11	15	11	17	14	14	13	11	25	22	8	16	18	12	10	19	17	15	15	13	14	14	11	14	18
D_abrahamii_RRN0033	8	9	9	4	5	8	4	7	13	13	8	8	8	13	9	9	10	8	6	5	6	7	13	10	13	13	9	14	10	20	8	11	16	8	10	16	17	14	18	17	13	11	10	11	7	11	10	13	15
D_abrahamii_RRN0034	7	7	5	7	1	3	1	6	6	6	5	3	1	13	3	4	1	2	9	4	5	11	3	9	3	7	3	1	2	22
D_abrahamii_SH0681	2	3	2	3	3	5	5	3	4	3	6	8	3	4	5	7	2	5	3	5	5	6	3	4	4	8	4	3	3	10
D_baronii_RBE2254	25	27	25	16	27	16	13	12	9	6	13	13	5	14	10	10	13	12	15	18	13	15	19	9	12	15	16	16	19	5
D_baronii_RBE2257	4	3	4	5	8	6	7	8	8	4	18	10	6	4	4	7	3	8	11	6	8	13	6	8	11	7	7	8	8	1
D_baronii_RBE2469	11	8	7	6	6	5	7	7	7	6	5	5	7	6	9	4	4	12	4	6	10	5	5	3	4	5	8	6	4	5
D_baronii_RBE2624	5	2	2	2	2	11	5	4	5	4	2	3	4	7	7	7	6	4	1	3	6	1	6	2	4	4	3	4	4
D_baronii_RNH1177	5	6	1	9	8	4	7	3	6	3	2	7	5	3	1	3	4	8	10	6	5	8	2	2	3	4	3	5	6	8
D_bathiei_KAD0143	8	6	4	8	2	3	14	7	2	6	4	5	9	14	13	17	15	12	3	6	11	16	16	2	3	14	7	2	6	6
D_bathiei_KAD0147	8	19	22	25	3	5	5	6	7	6	10	10	23	22	19	19	13	11	6	19	22	25	3	5	5	6	7	6	10	10
D_bathiei_KAD0150	3	1	5	6	6	4	6	8	4	2	5	3	3	11	5	9	4	4	4	6	8	4	9	11	10	8	9	7	7	9
D_bathiei_KAD0153	4	8	8	8	19	6	8	4	7	6	2	4	3	4	7	2	4	5	6	9	8	6	8	16	7	10	6	6	7	8
D_bathiei_RAV0097	3	2	2	3	2	2	2	3	3	2	4	2	4	5	4	2	2	4	3	1	1	3	3	6	1	5	3	2	2	2
D_chlorocarpa_CR7390	24	19	35	26	24	15	16	17	18	20	26	23	31	22	24	28	33	22	17	12	13	16	13	21	31	11	13	16	11	17
D_chlorocarpa_CR7422	11	11	12	14	17	9	12	13	11	9	16	15	10	14	16	15	14	15	12	13	13	15	17	13	12	11	17	12	9	23
D_chlorocarpa_RIR2903	14	11	11	11	12	16	13	18	23	17	14	11	11	11	12	16	13	18	23	17	14	11	11	11	12	16	13	18	23	14
D_chlorocarpa_RIR2904	14	16	13	16	14	18	17	11	14	14	14	16	13	16	14	18	17	11	14	14	14	16	13	16	14	18	17	11	14	13
D_chlorocarpa_SH0741	4	10	17	22	8	9	5	10	5	6	6	11	10	13	9	4	26	7	12	8	16	6	24	8	12	15	6	5	8	10
D_davidii_RIR3351	29	30	44	49	35	26	25	26	33	48	44	42	24	30	29	36	46	45	33	20	25	18	23	30	23	18	22	23	37	42
D_davidii_RIR3352	30	35	29	25	31	33	28	22	35	19	27	21	24	25	35	26	35	36	34	33	24	30	21	22	37	19	22	34	30	12
D_davidii_RIR3353	47	32	39	43	32	37	27	33	25	30	30	33	46	53	56	40	40	44	38	37	43	45	40	41	41	48	37	34	30	31
D_davidii_RIR3571	51	50	55	53	57	45	49	59	61	67	62	57	64	47	66	52	54	65	50	60	72	77	92	71	59	56	58	54	42	41	37
D_davidii_SH0733	34	31	18	28	35	40	25	24	34	27	26	28	25	16	20	31	19	36	18	23	42	34	36	26	21	38	22	42	34	19
D_greveana_RIR2421	11	10	11	9	16	10	12	6	6	5	7	10	17	13	6	8	6	7	11	7	11	10	12	10	16	6	7	8	11	9
D_greveana_RIR2913	4	6	3	8	7	5	7	6	8	6	7	9	7	8	4	6	6	7	6	6	6	8	6	7	6	7	9	8	5	8	8	5
D_greveana_RIR2914	10	8	8	11	11	7	9	7	11	8	12	16	14	9	11	15	14	11	17	14	13	18	12	11	15	10	12	12	10	10	10	10
D_greveana_RIR2915	6	4	5	3	9	5	7	3	6	8	7	5	4	3	3	6	3	4	5	3	6	4	6	5	7	6	6	6	4	3	6	8
D_greveana_RIR3214	13	13	8	12	18	12	15	21	22	16	15	12	18	11	15	10	14	9	17	13	12	13	17	14	15	13	13	20	16	8
D_greveana_RIR3215	11	10	11	9	16	10	12	6	6	5	7	10	17	13	6	8	6	7	11	7	11	10	12	10	16	6	7	8	11	9
D_greveana_RIR3219	5	6	7	5	4	6	10	7	6	8	6	5	9	8	10	8	10	9	10	9	3	5	4	4	3	7	6	6	6	4
D_greveana_SH0750	5	4	6	9	11	7	6	8	8	10	8	5	5	7	7	6	7	6	8	8	6	9	8	6	4	6	9	10	6	9	9	9
D_oronjiae_ANS0012	35	40	24	30	32	38	31	29	43	41	34	20	22	19	25	28	32	23	10	17	20	21	16	17	19	16	29	17	22	10
D_oronjiae_ANS0024	36	37	26	23	31	37	32	34	36	25	22	29	31	20	30	21	16	21	16	13	17	22	13	34	27	29	14	18	26	15
D_oronjiae_ANS0026	29	24	25	25	12	24	25	31	16	17	24	33	20	23	15	18	20	21	13	16	23	18	28	20	21	12	33	27	23	47
D_oronjiae_ANS0028	7	9	12	14	8	15	27	9	16	22	40	34	23	25	13	20	10	11	13	17	14	10	16	13	11	9	12	15	14
D_oronjiae_KAD0052	16	13	20	21	14	10	8	12	16	17	18	17	8	9	11	6	8	8	7	12	13	6	13	19	12	13	14	14	10	14
D_oronjiae_SH0690	15	22	14	21	14	12	41	15	11	24	30	27	10	14	19	13	23	18	15	32	25	14	16	22	34	9	14	14	10	46
D_lemurica_CR6514	108	95	102	88	82	91	75	79	105	85	73	96	108	95	102	88	82	91	75	79	105	85	73	96	106	97	95	88	82	56
D_lemurica_CR6519	54	50	35	26	38	35	26	26	42	60	69	77	67	81	58	72	50	62	38	47	60	47	54	72	31	30	32	42	45	49
D_lemurica_CR7441	152	112	64	44	53	45	67	103	113	67	66	64	56	70	63	60	65	85	89	44	80	108	75	122	66	59	71	56	44	61
D_lemurica_RIR3384	54	62	68	74	66	59	64	48	55	76	69	54	56	63	69	57	64	75	66	69	58	79	70	68	82	47	58	63	49	62
D_lemurica_RIR3387	84	92	102	90	110	86	75	89	94	109	115	120	123	58	49	78	65	80	84	72	57	86	90	98	109	112	89	90	85	101
D_lemurica_RIR3388	30	24	32	35	36	34	78	76	28	21	33	54	43	26	28	22	22	34	32	47	34	26	36	29	39	31	48	24	19	20
D_lemurica_RIR3419	12	16	10	14	16	16	24	28	13	32	30	26	31	14	22	18	16	33	47	44	37	42	33	45	35	43	23	30	33	35
D_lemurica_RIR3420	37	65	58	36	55	44	41	43	65	52	50	44	50	54	29	39	45	35	44	40	42	40	52	54	57	47	44	40	41	39
D_monticola_KAD0066	7	4	3	3	4	6	6	4	5	4	6	14	5	5	5	4	6	4	5	4	3	4	4	4	13	10	3	6	7	7	6	5	3
D_monticola_KAD0069	6	4	9	7	5	4	4	3	3	12	8	8	7	10	6	6	8	9	7	9	13	7	7	7	5	6	9	16	7	12	8	6	3
D_monticola_KAD0089	8	5	5	4	5	3	6	4	4	6	4	5	7	5	3	9	4	5	5	3	9	8	6	6	7	8	5	7	5	5	6	6	3
D_monticola_KAD0092	4	5	5	5	6	4	6	6	4	3	4	6	4	4	5	6	5	6	4	3	4	3	8	3	4	3	2	7	6	4	6	4	2
D_monticola_KAD0094	9	2	7	9	11	5	3	3	3	6	5	5	4	7	9	6	2	3	4	6	3	7	3	11	6	2	4	11	7	4	2	4	2
D_normandii_RBE2486	4	3	2	2	5	3	1	2	2	6	2	3	5	3	2	2	3	2	3	5	3	3	1	2	6	2	6	3	2	4
D_normandii_RBE2614	5	5	3	3	2	2	3	4	3	3	4	2	5	6	10	4	9	3	4	5	5	4	5	4	4	2	6	2	4	3
D_normandii_RZK8223	4	2	1	1	2	2	4	3	2	3	1	3	4	3	3	4	2	3	6	3	4	1	3	4	3	3	4	2	3	6
D_normandii_RZK8224	6	7	12	6	4	3	2	6	5	4	6	6	4	7	7	4	5	4	3	2	7	5	2	12	7	6	3	3	3	6
D_normandii_RZK8375	5	8	12	9	5	5	4	6	9	8	4	7	8	6	8	10	9	8	7	6	6	6	5	6	3	8	12	5	5	8
D_obtusa_RIR2441	13	14	16	15	6	14	18	18	14	24	12	10	20	20	28	32	35	12	14	19	14	21	12	11	13	21	23	22	10	10
D_obtusa_RIR2447	6	5	13	12	10	13	10	17	10	10	10	14	8	11	7	9	7	11	10	9	10	9	9	7	12	13	14	12	16	28
D_obtusa_RIR2834	14	10	11	14	15	20	10	10	13	14	10	9	13	16	15	15	10	11	15	12	15	11	11	15	10	16	12	9	6	4
D_obtusa_RIR2835	11	12	13	6	12	13	16	22	18	17	18	15	13	10	8	7	15	10	10	6	8	7	9	9	18	12	12	18	9	9
D_obtusa_RIR2842	17	19	19	19	21	20	17	17	19	17	17	17	21	18	19	19	19	21	20	17	17	19	17	17	17	21	17	15	10	13
D_orientalis_KAD0200	4	9	9	6	3	3	8	3	5	3	7	3	3	4	12	9	5	6	6	7	2	5	3	5	20	24	16	9	11	9
D_orientalis_RFN0021	7	2	5	7	8	3	7	3	2	2	2	9	3	6	4	3	5	2	2	5	4	5	6	3	3	6	2	3	6	3
D_orientalis_RFN0035	1	4	2	3	1	3	4	1	2	2	1	3	2	1	2	5	4	4	4	4	5	4	5	4	1	1	2	4	3	1
D_orientalis_RZK8269	5	11	3	2	5	3	4	6	1	2	5	4	3	6	7	6	14	4	3	4	7	1	1	3	3	5	4	2	1	5
D_orientalis_SAN0028	7	3	5	5	5	4	6	5	9	4	3	3	4	9	12	5	7	8	6	3	3	5	5	4	4	6	5	2	7	5
D_orientalis_SAN0031	3	4	5	5	6	4	6	9	4	5	7	2	6	4	2	4	8	4	4	5	7	4	9	5	3	7	6	4	7	9
D_pseudobaronii_ALR2439	8	4	7	2	5	4	6	6	5	8	3	5	4	5	11	13	5	7	6	7	9	4	5	6
D_pseudobaronii_ALR2440	21	15	16	14	12	3	4	8	4	12	9	22	17	13	6	9	8	7	4	6	3	7	6	2
D_pseudobaronii_ALR2446	8	8	9	7	5	8	8	7	13	6	6	6	6	10	11	5	8	7	12	4	5	11	13	4
D_pseudobaronii_RRN0026	7	3	3	5	4	6	5	5	4	16	7	8	17	8	8	9	15	10	11	6	19	10	10	5
D_pseudobaronii_RRN0027	9	14	8	21	3	9	3	17	5	6	10	4	19	8	11	7	5	8	11	5	10	12	7	6
D_purpurascens_RIR2410	11	10	9	8	10	7	10	8	11	7	10	6	8	8	5	11	9	5	10	9	5	11	6	6	7	6	6	5	9	5
D_purpurascens_RIR3335	22	27	16	11	16	12	14	14	17	15	10	11	20	24	29	12	15	16	18	18	18	15	20	33	27	10	9	8	8	24
D_purpurascens_RIR3336	11	9	7	11	13	11	16	6	8	5	10	9	12	12	13	7	13	8	7	16	8	6	11	6	11	8	3	15	11	11
D_purpurascens_RIR3337	16	11	13	3	6	11	17	13	11	10	11	13	7	11	9	4	2	10	12	11	8	11	22	16	15	11	13	13	12	13
D_purpurascens_ROZ0023	7	7	10	7	7	7	5	8	11	4	14	10	8	4	4	2	5	8	4	3	4	6	6	4	5	6	7	4	11	10
D_purpurascens_ROZ0024	21	16	16	11	15	20	14	11	12	18	24	11	18	7	10	10	8	16	9	9	10	24	9	15	25	8	11	13	10	10
D_razakamalalae_EME0023	4	3	4	5	4	3	1	4	5	6	5	4	6	4	6	6	6	5	7	3	8	5	3	2	6	6	6	4	3	5
D_razakamalalae_RFN0001	9	5	8	9	4	8	4	6	2	5	4	5	3	4	2	1	6	5	3	5	7	6	7
D_razakamalalae_RZK8035	19	24	6	11	15	6	8	8	10	9	6	29	23	22	28	18	16	33	21	12	11	8	7	7	8	7	13	6	8	9
D_razakamalalae_RZK8040	9	11	4	5	8	11	12	4	6	7	14	9	11	5	12	11	8	12	7	19	12	13	8	6	9	9	3	5	6	10
D_razakamalalae_SAN0023	5	8	7	7	5	2	2	2	4	7	5	11	5	5	6	6	5	8	2	3	6	3	7
D_razakamalalae_SAN0026	8	9	6	6	7	6	9	7	10	9	9	7	11	6	9	7	12	6	8	8	9	9	8
D_razakamalalae_SFR0255	5	3	3	4	2	3	4	3	6	2	5	3	3	4	2	3	4	3	6	2	5	3	3	4	2	3	4	3	6	2
D_urschii_ALR2443	10	11	8	12	10	11	9	9	11	10	19	16	7	8	10	10	11	8	12	10	11	9	9	11	10	19	16	7	8	10
D_urschii_RIR2458	5	4	7	3	9	6	8	5	9	7	4	15	10	10	8	8	16	3	11	5	9	7	4	15	10	10	8	8	4	5
D_urschii_RRN0043	8	9	4	3	7	7	4	6	3	3	6	5	12	7	2	3	8	2	11	8	4	6	4	7	9	3	2	7	2	12
D_urschii_RRN0044	6	8	10	7	5	11	7	7	6	10	5	4	6	2	5	7	4	9	5	17	8	8	8	5	10	6	12	5	11	24
D_urschii_RRN0045	10	8	11	10	18	12	9	4	10	6	9	5	6	15	12	7	3	9	16	20	10	8	15	6	15	10	21	10	7	10
[truncated: 11 more columns]

## Sheet: VL
id	M1	M2	M3	M4	M5	M6	M7	M8	M9	M10	M11	M12	M13	M14	M15	M16	M17	M18	M19	M20	M21	M22	M23	M24	M25	M26	M27	M28	M29	M30	M31	M32	M33	M34	M35	M36	M37	M38	M39	M40	M41	M42	M43	M44	M45	M46	M47	M48	M49
D_abrahamii_KAD0058	180	230	200	210	210	180	180	180	200	200	220	190	150	150	120	170	170	160	300	170	190	150	200	150	180	150	170	160	190	220	120	160	160	130	120	150	200	170	140	110	130	130	160	140	160	140	190	160	110
D_abrahamii_KAD0059	200	200	200	180	190	190	170	170	150	200	150	150	200	180	200	190	180	190	200	200	180	180	180	250	150	200	180	150	190	190
D_abrahamii_KAD0060	200	260	280	230	300	170	180	170	170	100	220	220	110	130	150	180	200	180	150	220	150	180	200	190	170	180	140	200	140	170	160	160	140	210	160	150	150	90	140	150	120	140	150	150	160	170	150	150	160
D_abrahamii_RBE2765	200	200	150	170	170	160	170	100	190	150	170	160	160	180	140	150	150	190	160	150	170	160	150	190	180	150	160	170	150	80
D_abrahamii_RRN0033	150	160	150	160	150	180	140	170	180	140	170	170	140	120	150	140	150	150	130	150	170	180	180	140	200	180	190	100	130	170
D_abrahamii_RRN0034	150	160	130	120	150	150	150	120	150	170	90	120	170	160	150	140	150	70	140	170	140	150	160	100	90	90	170	160	120	150
D_abrahamii_SH0681	150	180	160	150	200	150	150	170	190	190	130	150	160	190	160	190	190	170	200	190	170	190	150	200	170	180	150	190	220	200
D_baronii_RBE2254	200	200	200	200	150	170	170	250	250	200	200	150	150	200	200	200	170	250	200	170	200	200	250	200	200	150	200	250	200	200
D_baronii_RBE2257	230	180	220	250	200	220	200	200	200	200	180	190	190	190	170	220	240	200	180	170	180	180	190	170	200	190	200	170	200	200
D_baronii_RBE2469	180	180	200	180	210	180	200	220	220	200	210	220	210	160	160	180	160	170	190	200	200	220	200	190	190	180	190	190	160	150
D_baronii_RBE2624	130	60	140	150	80	140	170	70	40	50	140	110	60	130	140	90	100	70	140	50	30	50	80	120	80	110	60	80	40	100
D_baronii_RNH1177	140	150	200	200	190	150	180	150	150	150	190	190	200	210	180	100	100	170	180	180	170	220	150	150	290	170	200	200	190	190
D_bathiei_KAD0143	150	230	200	220	230	210	240	200	180	220	260	200	160	230	200	220	230	170	170	200	190	210	190	210	190	230	190	230	200	180
D_bathiei_KAD0147	170	180	160	150	200	150	160	190	170	180	160	200	140	190	180	200	190	160	150	160	190	140	180	180	180	140
D_bathiei_KAD0150	140	190	130	170	120	130	150	170	170	190	160	200	180	190	170	190	160	150	180	180	150	170	200	150	160	140	150	210	190	180
D_bathiei_KAD0153	240	210	200	170	200	180	200	190	190	220	130	220	190	230	240	260	190	230	210	230
D_bathiei_RAV0097	180	200	210	180	180	210	180	200	200	210	200	200	200	190	170	240	230	180	230	170	200	180	120	210	220	210	220	180	210	210
D_chlorocarpa_CR7390	130	180	170	180	150	200	170	130	210	200	170	190	180	170	160	190	160	180	170	160	190	190	190	150	160	170	150	180	170	210
D_chlorocarpa_CR7422	160	150	180	150	160	180	160	160	160	180	190	160	150	200	150	220	140	150	160	170	160	150	170	160	100	110	120	180	120	140	100
D_chlorocarpa_RIR2903	132	153	153	134	173	125	149	136	150	145	172	147	181	127	139	135	140	139	185	156	149	167	142	147	146	137	160	164	199	149
D_chlorocarpa_RIR2904	158	185	192	185	171	185	195	158	123	165	82	96	110	85	117	72	147	68	129	158	171	180	210	140	70	170	160	180	200	200
D_chlorocarpa_SH0741	170	160	170	170	170	160	160	160	180	180	150	120	120	180	160	180	170	170	150	150	200	160	190	170	180	160	190	160	160	160
D_davidii_RIR3351	160	130	160	190	190	120	130	130	160	120	130	130	150	140	150	150	170	150	190	120	170	190	100
D_davidii_RIR3352	170	180	170	190	180	170	150	160	180	180	150	190	200	170	210	160	150	200	190	160	180	170	150	120	160	140	180	160	170	160
D_davidii_RIR3353	160	180	170	170	160	190	180	180	150	170	170	180	160	160	170	190	180	150	180	180	200	170	180	180	170	160	160	170	150	200
D_davidii_RIR3571	150	140	120	140	130	150	160	130	130	120	140	140	140	130	150	130	140	130	160	150	150	140	140	170	140	150	150	140	140	160
D_davidii_SH0733	200	180	160	190	200	160	190	250	90	170	160	140	120	120	130	160	140	180	190	160	170	230	150	130	200	170	90	170	160	190
D_greveana_RIR2421	240	200	230	210	220	250	280	240	230	240	290	230	220	200	240	150	270	150	160	170	160	155	190	170	160	190	140	190	150	140	150	160
D_greveana_RIR2913	180	170	220	150	180	150	150	180	200	170	150	160	190	120	200	190	150	180	150	200	180	200	190	190	180	170	200	200	160	150	180	150
D_greveana_RIR2914	160	120	130	140	190	140	170	120	150	150	200	180	160	140	150	180	160	170	140	150	130	120	180	120	140	140	170	170	170	200	150	140
D_greveana_RIR2915	200	205	150	160	90	100	175	175	125	175	170	180	215	165	180	150	75	80	100	145	170	155	210	145	195	200	225	190	160	200	170	150
D_greveana_RIR3214	125	115	125	175	150	145	155	140	150	190	145	190	180	200	150	130	160	150	190	145	280	190	150	155	190	150	170	85	185	150	150	150
D_greveana_RIR3215	175	145	150	138	155	55	138	138	125	130	165	138	148	148	165	170	100	145	128	130	165	160	165	170	125	145	200	130	132	135	160	140
D_greveana_RIR3219	230	240	140	200	200	210	210	170	190	180	240	240	220	180	240	210	210	220	200	200	160	220	190	190	190	220	250	210	170	210	220	200
D_greveana_SH0750	180	140	160	150	120	150	140	170	150	140	150	150	140	160	150	150	150	150	160	130	100	180	140	120	130	180	150	150	140	160	150	160
D_oronjiae_ANS0012	150	160	120	130	120	120	140	120	130	130	140	140	120	130	140	130	130	140	100	120	100	130	130	110	120	90	140	130	120	90
D_oronjiae_ANS0024	160	170	200	230	200	170	150	240	160	140	210	150	160	210	210	140	170	120	190	120	170	140	150	240	130	120	160	250	160	200
D_oronjiae_ANS0026	150	170	170	130	180	180	150	130	170	150	160	160	150	130	110	170	200	160	100	140	140	120	140	190	160	170	160	90	160	180
D_oronjiae_ANS0028	140	190	180	200	170	180	150	160	170	150	180	150	230	150	150	200	170	180	180	180	190	170	150	100	200	190	130	160	150	150
D_oronjiae_KAD0052	150	200	150	180	180	180	190	180	200	180	200	170	200	200	150	200	200	170	200	180	200	200	200	200	200	200	190	200	210	210
D_oronjiae_SH0690	130	140	160	120	150	140	130	150	160	140	160	130	120	130	150	150	150	130	150	130	130	150	110	140	120	130	160	140	140	150
D_lemurica_CR6514	130	170	170	120	120	100	150	120	100	150	160	60	70	100	70	80	170	90	50	160	170	150	150	130	150	140	140	130	140	140
D_lemurica_CR6519	130	150	150	140	150	150	160	160	160	160	180	200	120	180	170	150	150	140	150	140	150	150	150	150	150	170	160	150	140	150
D_lemurica_CR7441	120	150	140	130	130	100	50	160	140	130	130	140	130	110	160	90	130	160	160	140	150	140	150	150	150	150	140	140	130	140
D_lemurica_RIR3384	150	140	130	200	100	100	160	150	110	100	200	100	200	170	150	100	110	150	140	140	120	140	170	100	130	150	80	130	100	150
D_lemurica_RIR3387	140	130	160	160	140	130	120	80	150	140	110	160	150	240	160	120	170	140	150	130	100	110	150	170	140	70	200	140	170	150
D_lemurica_RIR3388	120	100	110	70	90	160	140	120	120	130	140	150	135	150	140	70	140	150	70	140	100	70	110	150	110	140	80	120	100	80
D_lemurica_RIR3419	90	100	80	130	120	150	150	120	150	160	120	120	160	110	160	140	180	150	100	110	120	120	140	110	140	150	190	140	160	150
D_lemurica_RIR3420	150	130	140	130	150	150	140	130	160	150	160	130	150	130	150	120	150	140	120	200	200	150	130	140	170	150	170	150	130	150
D_monticola_KAD0066	130	100	155	180	155	140	140	150	150	190	140	160	190	140	170	160	170	170	130	160	160	140	150	160	140	160	130	170	170	220	190	190
D_monticola_KAD0069	190	190	210	170	180	140	150	190	160	150	110	130	200	180	120	190	140	170	150	160	180	155	120	200	170	180	190	160	170	140	140	130
D_monticola_KAD0089	175	200	210	215	170	200	170	180	190	190	150	200	210	165	190	180	200	210	220	210	200	190	210	200	210	230	180	190	200	120	170	155
D_monticola_KAD0092	170	190	150	200	170	190	190	135	90	140	165	165	190	200	190	200	200	210	200	155	180	145	135	190	190	190	185	125	175	210	170	165
D_monticola_KAD0094	160	150	180	190	180	180	120	180	140	220	240	200	230	220	220	220	170	200	180	210	230	190	180	200	190	175	220	200	190
D_normandii_RBE2486	180	180	280	300	180	70	300	340	200	270	200	260	280	230	150	130	270	190	170	280	270	270	300	260	160	100	200	250	230	100
D_normandii_RBE2614	230	240	220	230	250	200	270	250	210	270	200	240	300	200	170	250	200	250	250	270	150	200	250	230	250	200	230	200	190	230
D_normandii_RZK8223	240	280	270	120	140	160	200	150	230	260	260	240	270	200	250	250	240	230	280	250	290	130	120	100	120	120	60
D_normandii_RZK8224	300	320	300	320	260	280	250	300	260	270	280	300	250	300	300	250	280	280	310	280	250	250	250	280	300	270	300	220	280	300
D_normandii_RZK8375	290	210	220	210	250	300	230	240	270	160	230	230	310	180	210	240	210	220	220	230	220
D_obtusa_RIR2441	190	150	160	200	180	190	200	200	200	200	180	200	200	180	180	200	200	170	180	150	160	200	150	170	180	180	180	200	160	170
D_obtusa_RIR2447	200	210	190	150	110	330	180	120	100	90	140	130	150	160	170	200	210	190	150	110	330	180	120	100	90	140	130	150	160	170
D_obtusa_RIR2834	160	190	150	180	190	140	190	160	180	150	160	160	170	140	160	200	170	140	150	210	200	170	140	160	170	180	165	210	140	150
D_obtusa_RIR2835	180	160	190	190	160	150	160	200	160	180	200	180	170	130	110	160	190	150	150	200	140	190	180	150	190	200	190	160	205	140
D_obtusa_RIR2842	180	160	110	150	160	210	170	180	160	150	190	170	190	180	160	160	150	180	170	160	160	160	140	180	160	160	190	200	150	200
D_orientalis_KAD0200	210	170	190	180	230	210	190	200	220	180	200	180	150	210	180	220	190	190	210	190	220	180	200	200	210	140	150	200	150	160
D_orientalis_RFN0021	200	200	190	190	140	180	170	190	190	160	160	170	170	100	200	200	180	170	180	190	240	170	120	210	210	180	180	180	180	180
D_orientalis_RFN0035	150	150	140	60	210	150	170	160	170	180	180	190	170	180	160	190	160	190	180	140	170	160	170	150	180	190	140	200	190	180
D_orientalis_RZK8269	160	170	180	170	120	140	160	180	210	210	90	90	70	80	160	150	200	190	160	140	180	140	180	170	110	160	180	240	190	180
D_orientalis_SAN0028	220	210	220	120	140	240	160	150	220	250	180	230	160	100	210	210	230	220	240	190	230	220	240	240	250	260	250	240	240	280
D_orientalis_SAN0031	120	180	210	200	100	90	210	150	160	120	200	180	190	200	180	200	220	220	210	190	180	190	200	220	220	260	250	190	210	210
D_pseudobaronii_ALR2439	170	100	90	140	150	180	180	180	190	200	150	220	190	110	110	60
D_pseudobaronii_ALR2440	170	190	160	190	150	170	170	120	250	100	110	190	170	100	140	90	190	100	180	110	150
D_pseudobaronii_ALR2446	170	180	180	160	180	170	150	170	170	180	170	160	160	170	140	150	150	170	150	100	100	180	160	150	160	140	200	160	150	150
D_pseudobaronii_RRN0026	200	220	180	180	210	180	160	250	190	200	210	190	170	150	200	140	200	240	180	80	130	160	90	130	170	180	170	110	90	110
D_pseudobaronii_RRN0027	150	150	70	180	150	130	140	160	100	160	160	160	200	130	150	200	130	190	140	130	150	140	150	130	140	150	110	120
D_purpurascens_RIR2410	200	180	170	170	130	180	200	180	180	200	180	180	180	180	190	200	180	190	200	160	180	180	200	160	170	170	190	200	170	190
D_purpurascens_RIR3335	160	120	140	160	130	160	180	160	180	140	150	130	170	120	100	170	100	120	160	140	120	100	110	140	130	150	150	160	160	160
D_purpurascens_RIR3336	130	150	150	160	130	140	140	130	100	140	160	150	160	150	150	170	150	160	190	140	130	150	140	210	150	140	140	140	130	70
D_purpurascens_RIR3337	70	140	150	150	150	190	200	160	150	210	120	180	140	180	180	150	160	140	150	160	120	120	130	150	140	130	120	100	160	150
D_purpurascens_ROZ0023	120	160	140	150	100	160	150	150	190	130	160	150	150	160	130	160	140	140	60	120	100	150	100	200	170	170	110	130	120	160
D_purpurascens_ROZ0024	120	150	120	130	110	120	115	170	130	160	130	130	130	140	150	150	120	110	140	150	150	170	160	130	120
D_razakamalalae_EME0023	180	200	150	150	150	170	180	180	190	180	220	180	200	150	150	180	150	170	170	150	150	130	160	150	160	150	170	140	180	150
D_razakamalalae_RFN0001	240	150	170	150	200	210	190	170	170	220	190	190	150	180	200	210	190	200	170	200	180	180	100	100	190	190	170	170	190	200
D_razakamalalae_RZK8035	310	350	200	340	260	240	360	365	370	350	360	430	400	380	300	280	360	390	380	360	290	210	280	290	280	300	250	310	190	480
D_razakamalalae_RZK8040	200	190	160	220	210	380	260	210	210	160	110	110	115	240	200	220	80	160	140	200	80	180	160	230	170	190	200	180	190	200
D_razakamalalae_SAN0023	90	50	100	60	100	110	70	100	50	140	60	70	110	100	100	100	100	90	90	80	80	50	120	40	70	60	70	100	90	60
D_razakamalalae_SAN0026	150	180	170	190	210	180	190	170	150	170	180	150	190	170	190	160	230	150	170	180	200	150	170	160	180	260	170	140	200	170
D_razakamalalae_SFR0255	150	140	130	210	160	190	180	170	165	195	180	190	190	210	200	200	185	200	185	190	185	190	200	200	190	210	210	210	220	170
D_urschii_ALR2443	140	170	140	160	150	150	110	100	120	60	100	160	160	130	150	170	140	100	140	130	130	110	150	130	130	140	180	190	120	150
D_urschii_RIR2458	170	200	140	150	180	200	180	180	180	180	160	150	150	180	180	180	190	180	180	180	180	200	180	180	200	130	160	190	200	200
D_urschii_RRN0043	110	160	130	110	120	120	130	160	160	170	150	170	160	160	150	150	180	140	100	150	120	120	150	120
D_urschii_RRN0044	200	160	120	140	150	90	140	100	120	130	120	120	80	130	140	50	80	100	140	100	50	100	160	120	130	100	120	120	130	120
D_urschii_RRN0045	150	160	150	170	180	200	160	130	160	160	150	180	170	110	150	120	150	70	80	140	150	150	120	140	160	180	140	140	160	150
[truncated: 11 more columns]

## Sheet: FL
id	M1	M2	M3	M4	M5	M6	M7	M8	M9	M10	M11	M12	M13	M14	M15	M16	M17	M18	M19	M20	M21	M22	M23	M24	M25	M26	M27	M28	M29	M30	M31	M32
D_abrahamii_KAD0058	950	1200	560	1000	1200	960	1000	1150	1200	1300	850	1300	750	1300	1100	1100	1000	990	950	1200	1160	730	800	900	950	1000	1100	1000	1040	1150
D_abrahamii_KAD0059	980	820	930	720	1040	760	960	750	940	870	950	1020	780	930	920	680	870	710	730	800	870	860	850	990	830	950	670	950	680	610
D_abrahamii_KAD0060
D_abrahamii_RBE2765	820	810	590	630	750	870	510	550	590	760	810	640	550	870	470	650	790	470	580	550	710	630	630	620	620	490	670	650	480	670
D_abrahamii_RRN0033	970	910	490	830	650	820	530	890	760	610	860	840	750	950	780	570	910	840	720	700	580	720	800	940	790	700	880	700	850	560
D_abrahamii_RRN0034
D_abrahamii_SH0681	940	830	800	1030	750	850	900	770	730	490	920	880	980	960	800	750	770	970	980	660	420	700	830	620	730	620	720	680	800	690
D_baronii_RBE2254	800	1200	1150	1000	1000	1200	1200	1200	1200	1300	1100	1100	1100	1000	1200	1200	1000	1300	1200	1200	1200	1300	1000	1000	1100	1000	1100	1000	1000	1000
D_baronii_RBE2257	1000	1000	1100	1100	800	900	1200	900	1100	1200	1100	950	1000	1000	1100	1000	1000	1200	1000	1100	1000	1000	1200	1000	1100	1100	1000	1000	1000	1000
D_baronii_RBE2469	1000	1150	1000	1000	1000	1100	1200	1000	1000	1000	1200	1100	1100	900	800	1100	1100	900	1100	1200	1000	1100	1000	1000	900	1300	1200	900	1200	900
D_baronii_RBE2624	520	750	870	770	610	850	730	400	820	830	650	720	860	860	930	430	820	900	840	730	850	590	850	790	910	690	720	820	850	710
D_baronii_RNH1177	980	1240	1230	1100	1200	1070	1030	1080	1010	870	800	770	1250	1680	700	1040	1020	1250	1870	910	1210	820	900	1050	1120	900	910	1350	1300	1080
D_bathiei_KAD0143	700	1120	1080	1140	620	1010	890	1060	1050	830	580	1060	710	910	870	620	610	770	1100	1010	900	590	1040	920	1100	1000	1130	1080	960	1160
D_bathiei_KAD0147	1200	1070	1080	1000	900	980	940	1020	910	1040	1250	1220	1200	1150	600	1200	720	870	1100	1060	910	880	1300	610	540	810	1060	960	690	1010
D_bathiei_KAD0150	1050	530	960	910	970	650	870	790	880	950	860	840	850	830	630	630	1050	710	1090	1050	770	860	890	780	780	830	730	950	940	640
D_bathiei_KAD0153	990	800	900	790	840	790	1000	1210	1290	1240	1150	1170	1090	1090	970	1010	900	1100	620	1040	980	830	1140	1200	1060	1170	1060	1150	940	710
D_bathiei_RAV0097	1200	1400	800	1600	1350	1400	1600	1600	1600	1200	1200	1420	1150	1500	1000	1105	1100	1500	1400	1200	1400	1400	1500	1400	1500	1350	1400	1400	1550	1200
D_chlorocarpa_CR7390	750	770	490	610	400	570	760	660	820	830	640	420	930	420	750	530	560	770	720	650	840	960	880	860	610	560	940	750	680	470
D_chlorocarpa_CR7422
D_chlorocarpa_RIR2903	900	1100	1200	1000	1100	950	850	1000	850	1000	1000	1000	900	1000	900	900	1000	900	1000	1000	1000	900	900	1200	1300	950	850	1100	1200	1300
D_chlorocarpa_RIR2904	850	1110	920	1000	930	950	600	900	850	800	780	1080	1050	1000	900	800	960	920	800	920	1050	910	900	1200	850	900	900	1070	850	1110
D_chlorocarpa_SH0741	800	950	950	800	750	900	850	950	900	900	850	950	750	950	700	800	900	700	800	850	850	850	750	750	750	850	850	900	850	900
D_davidii_RIR3351	950	790	800	950	1010	920	610	850	1040	1120	1000	1060	1020	1040	860	1100	920	1020	920	930	1000	1200	1000	1100	1010	940	1060	700	1080	1100
D_davidii_RIR3352	950	850	800	810	700	960	750	800	880	940	700	910	760	910	800	900	830	970	810	960	720	970	620	840	950	660	930	1100	1030	940
D_davidii_RIR3353	950	1130	860	860	960	980	1040	1200	1050	900	930	890	780	1000	1170	1040	1020	870	940	640	1230	1000	890	640	960	1130	870	910	1000	680
D_davidii_RIR3571	690	750	750	640	470	620	780	600	880	570	770	1000	820	690	680	670	810	800	820	740	830	890	600	700	590	890	380	680	770	350
D_davidii_SH0733	690	890	360	660	830	640	420	810	690	860	440	690	700	680	920	970	730	620	900	520	460	930	600	610	790	810	530	640	540	590
D_greveana_RIR2421	1030	710	1020	650	1110	880	1040	1090	830	1070	1000	1040	950	1060	1100	920	1050	1060	810	1170	1080	850	770	920	1010	970	890	690	1150	580
D_greveana_RIR2913	990	1000	1040	890	990	1090	990	880	960	1100	880	990	970	740	820	900	940	970	890	930	940	1000	860	820	970	950	980	1100	840	830	840	940
D_greveana_RIR2914	990	1030	880	1030	840	1000	920	1420	830	900	800	720	810	1050	880	920	800	850	870	1000	1200	960	1140	920	1070	900	810	910	850	730	860	910
D_greveana_RIR2915	1320	1050	1400	1330	1525	1650	1300	1250	1610	1340	1825	1500	1450	1200	1360	1150	1200	1725	1150	1250	1175	1350	1240	1410	1250	1200	1200	1255	1350	1200	1350	1200
D_greveana_RIR3214	870	720	1110	1160	1190	870	1090	1080	1160	1050	1030	990	870	850	1220	890	710	1070	960	720	600	1050	840	820	1130	1030	700	1060	1090	1140
D_greveana_RIR3215	950	1200	790	980	1050	540	730	1040	1050	790	700	1030	590	800	910	1020	480	630	810	590	970	900	1060	1030	600	910	590	790	1130	810
D_greveana_RIR3219	1030	710	1020	650	1110	880	1040	1090	830	1070	1000	1040	950	1060	1100	920	1050	1060	810	1170	1080	850	770	920	1010	970	890	690	1150	580
D_greveana_SH0750	800	850	850	600	750	950	850	850	850	950	1000	900	750	850	850	900	950	800	900	800	900	800	1000	900	900	850	850	900	900	800	850	900
D_oronjiae_ANS0012	840	780	1000	590	630	720	720	860	670	750	620	710	830	660	840	780	690	890	760	1030	810	830	780	800	870	860	760	850	920	830
D_oronjiae_ANS0024	610	770	490	1200	950	500	690	540	550	800	660	740	480	480	550	560	630	720	1060	560	700	470	650	610	630	570	660	800	650	510
D_oronjiae_ANS0026	1100	760	980	710	1010	860	860	840	950	1090	810	850	1010	800	640	970	1000	780	930	1010	860	750	760	1100	810	890	900	800	780	820
D_oronjiae_ANS0028	950	840	720	960	710	1190	820	970	1010	930	740	1000	780	1030	920	1210	780	660	790	860	780	710	820	710	770	960	900	890	620	610
D_oronjiae_KAD0052	990	1010	910	760	940	990	650	830	1000	1080	710	830	820	940	1030	980	740	550	940	910	1040	550	920	800	1080	890	970	900	660	1160
D_oronjiae_SH0690	1200	1200	1200	1000	1000	1100	1100	1100	1100	1200	1000	1000	1300	1200	1000	1000	1000	1100	1000	1300	1000	1100	1100	1100	1000	1000	1100	1000	1200	1000
D_lemurica_CR6514	600	600	750	750	900	850	700	700	700	800	650	850	900	850	750	800	750	750	700	750	700	900	700	900	850	750	750	950	650	950
D_lemurica_CR6519	1000	1100	1000	1000	1200	1000	950	1000	1000	1000	1000	1000	1000	1000	1100	900	1000	1100	950	900	1000	800	1000	1000	1000	1000	1000	1000	1000	1000
D_lemurica_CR7441
D_lemurica_RIR3384	600	620	690	590	640	600	730	750	710	730	640	800	700	920	680	680	670	650	800	850	770	720	670	480	600	780	540	620	760	720
D_lemurica_RIR3387	700	710	580	900	850	800	780	720	800	680	610	830	670	760	800	600	560	640	500	650	800	640	720	580	590	710	850	1000	660	570
D_lemurica_RIR3388	960	700	850	670	700	820	660	690	670	700	800	600	720	640	720	800	580	780	700	850	800	700	820	700	640	720	750	720	770	900
D_lemurica_RIR3419	450	840	730	960	660	720	820	650	860	700	1100	900	900	920	880	650	930	900	820	800	830	610	840	930	900	860	830	900	840	900
D_lemurica_RIR3420	1100	900	940	800	850	950	1100	1000	1100	1000	1400	1150	1050	720	950	900	950	960	800	940	1100	1010	1030	1000	1000	1000	980	1020	1000	1000
D_monticola_KAD0066	1260	1250	1100	1240	1250	1040	1470	1290	1200	1170	1240	1270	1190	950	1270	1030	1000	1090	990	940	860	1370	1420	920	1340	1420	1240	1140	1040	1120	1270	1310
D_monticola_KAD0069	1160	900	1030	1220	1120	890	570	1090	980	800	1200	1160	1000	1230	1000	930	1060	1220	1120	940	730	1190	1000	1030	1070	910	940	910	1220	1150	920	740
D_monticola_KAD0089	1160	1150	1170	1320	1190	1000	970	1070	840	1230	1340	1170	1250	1240	840	1260	1290	1430	1480	920	910	1470	1180	1480	960	1290	1570	1300	1320	870	1000	1210
D_monticola_KAD0092	1320	1280	1530	1000	1000	1040	700	1070	1230	620	1050	800	1250	1240	1010	810	870	1050	1220	1030	1250	1000	1100	1020	620	1060	930	1290	1050	1100	820	700
D_monticola_KAD0094	1180	890	1180	910	1140	1160	1320	1160	1000	1180	1150	1050	1070	1140	1290	1010	1150	920	1190	1030	1000	1180	1240	1240	980	1130	940	1030	1210	1000	1100	1000
D_normandii_RBE2486	2200	2000	2100	2500	1700	1900	1900	1400	1900	2400	1300	2100	1300	1800	1300	1900	2100	1750	2000	2000	1600	2200	1900	2000	1300	1000	1800	1850	1700	2000
D_normandii_RBE2614	1250	1300	1430	1500	1200	1300	1030	1300	1350	1440	1500	1200	1280	1400	1550	1250	1250	1100	1370	1400	1050	1360	1300	1070	1300	1100	1580	1480	1200	1570
D_normandii_RZK8223
D_normandii_RZK8224	660	960	1150	860	1220	860	940	1010	950	760	880	970	840	960	910	870	1040	880	990	590	960	760	840	1060	930	910	880	410	760	820
D_normandii_RZK8375	1180	740	750	860	680	1000	840	920	620	1000	770	610	410	1050	780	870	760	1040	840	730	1100	1080	740	850	960	890	1070	860	770	1200
D_obtusa_RIR2441	900	850	850	900	600	950	900	1000	700	900	900	950	900	1000	1000	1000	1000	950	750	800	750	800	750	700	850	900	900	800	900	1000
D_obtusa_RIR2447	900	900	800	900	800	800	900	850	900	850	850	800	800	700	700	800	750	900	700	800	750	800	700	800	750	800	700	800	900	850
D_obtusa_RIR2834	800	950	750	700	700	850	850	700	700	650	900	950	750	850	800	750	950	850	950	950	900	950	800	850	600	850	800	800	1000	700
D_obtusa_RIR2835	900	800	800	750	600	650	750	650	650	800	800	700	800	900	800	750	750	800	800	700	650	800	700	700	800	800	800	800	800	850
D_obtusa_RIR2842	700	700	950	700	700	800	750	700	750	800	700	750	750	700	750	700	800	800	850	800	700	850	800	700	700	900	900	700	800	900
D_orientalis_KAD0200	650	560	770	670	1070	1020	440	800	750	660	430	670	1000	1020	720	490	1320	1070	1150	620	590	730	680	660	680	670	920	960	490	610
D_orientalis_RFN0021	1010	1500	1100	1000	1150	1300	1020	1000	1400	1400	1600	1200	1040	1500	1200	900	1010	1200	1050	1300	930	1200	1300	1560	600	850	810	700	1020	1050
D_orientalis_RFN0035	1100	990	1300	1000	1500	1000	1400	1500	1300	1500	850	1120	1500	890	1090	1000	1100	1400	1500	1400	800	1500	1200	820	1100	1150	1200	1200	1400	1300
D_orientalis_RZK8269	1200	1000	1000	1010	1300	1050	900	1200	1500	1300	600	1400	860	1300	1400	1450	1300	1400	1200	1200	1300	1700	800	1400	1400	750	1200	1110	1000	800
D_orientalis_SAN0028	1200	1500	1400	1150	1500	1400	700	1400	1400	1300	1400	1000	1600	1400	1400	1080	1600	1400	1300	1000	990	1400	900	1000	1100	1500	1000	1100	1150	890
D_orientalis_SAN0031	960	1200	1250	1340	1400	1080	1240	1110	1300	1250	910	1240	1090	1280	1100	550	1400	1300	1250	1120	1300	1500	1110	1100	1250	850	1450	1220	1005	1300
D_pseudobaronii_ALR2439
D_pseudobaronii_ALR2440	670	750	940	760	530	1020	950	750	1020	750	800	650	700	920	650	700	950	750	780	950	760	720	850	820	1000	900	850	900	1000	800
D_pseudobaronii_ALR2446	780	880	850	1100	1000	700	560	940	1150	1200	700	900	550	900	920	1000	950	900	890	710	720	650	1100	920	1050	700	600	750	800	900
D_pseudobaronii_RRN0026
D_pseudobaronii_RRN0027	980	700	940	920	650	820	900	860	900	650	800	1100	650	800	600	850	930	1100	450	1120	800	620	980	800	750	1000	850	1030	900	600
D_purpurascens_RIR2410	1000	1100	1000	1000	950	850	1000	950	1000	1100	1200	900	1000	1000	900	900	900	1200	1100	1000	1000	950	1000	900	850	1100	1100	1100	1000	1000
D_purpurascens_RIR3335
D_purpurascens_RIR3336	940	800	750	1100	850	1180	1020	960	970	650	1300	760	920	830	1050	820	800	920	820	1015	910	850	820	1080	1000	980	880	650	840	870
D_purpurascens_RIR3337
D_purpurascens_ROZ0023	1200	950	1150	800	1300	1100	780	780	1050	900	670	1350	1100	700	960	920	1200	1000	1000	840	1200	800	820	810	1800	960	950	950	950	1100
D_purpurascens_ROZ0024
D_razakamalalae_EME0023	850	900	1000	1100	1000	950	1100	1000	1100	900	1000	1100	800	1000	1000	900	1100	1000	1000	900	1000	1000	900	1200	900	850	1000	1000	1000	1000
D_razakamalalae_RFN0001	1390	850	720	700	650	1200	950	700	910	460	970	1350	900	1400	1070	1060	1360	1080	1250	590	1230	730	970	910	770	580	1200	610	800	550
D_razakamalalae_RZK8035	800	800	800	800	800	900	1000	700	700	900	900	850	850	1000	1000	1000	900	950	1000	1000	700	1000	1000	750	1000	1200	900	1000	1100	1200
D_razakamalalae_RZK8040	850	1000	1000	1000	1000	900	1200	1100	900	800	800	900	900	900	900	1000	1000	1000	850	900	1000	950	1200	900	900	800	800	900	800	900
D_razakamalalae_SAN0023	850	1190	820	600	1250	950	980	880	830	900	1050	880	970	80	970	1020	600	980	830	1100	920	890	900	940	800	1010	950	1110	770	850
D_razakamalalae_SAN0026	1040	1030	910	970	870	1040	1010	710	830	850	800	1050	970	910	790	890	950	830	960	1010	820	950	740	880	1090	700	990	940	710	800
D_razakamalalae_SFR0255	1100	1300	1200	1100	1100	1100	1000	1300	1000	1000	1000	950	1000	1300	1100	1000	850	850	900	800	800	800	900	1000	850	700	900	850	1000	900
D_urschii_ALR2443
D_urschii_RIR2458	850	900	950	1000	1000	900	1000	900	950	1100	1000	850	1100	1000	1000	1000	900	1000	900	800	1200	1000	1000	950	1000	1000	1100	1000	1000	1000
D_urschii_RRN0043
D_urschii_RRN0044
D_urschii_RRN0045	750	800	1030	1100	1000	710	820	640	600	680	830	810	640	1040	680	720	750	970	830	490	630	950	890	830	1150	940	700	1100	820	1000

## Sheet: RH
id	M1	M2	M3	M4	M5	M6	M7	M8	M9	M10	M11	M12	M13	M14	M15	M16	M17	M18	M19	M20	M21	M22	M23	M24	M25	M26	M27	M28	M29	M30	M31	M32	M33	M34	M35	M36	M37	M38	M39	M40	M41	M42	M43	M44	M45	M46	M47	M48	M49
D_abrahamii_KAD0058	250	120	110	100	120	240	100	120	130	300	100	200	160	260	180	100	80	360	400	250	240	240	200	160	250	350	160	100	260	130
D_abrahamii_KAD0059	90	120	150	120	220	120	130	100	250	120	270	310	130	140	160	260	290	130	120	110	150	310	180	70	280	250	120	150	150	200
D_abrahamii_KAD0060	140	100	150	270	110	100	140	120	110	160	120	130	110	120	120	260	150	120	100	100	140	150	120	150	120	110	300	160	140	280	320	110	130	80	150	250	260	140	160	120	140	200	120	150	370	160	130	120	100
D_abrahamii_RBE2765	230	100	10	500	110	120	100	150	120	110	80	120	80	100	120	230	190	130	120	100	100	110	240	110	80	110	130	280	110	120
D_abrahamii_RRN0033	100	110	90	250	100	100	110	200	100	100	100	70	100	110	60	100	130	90	260	100	270	90	210	80	110	80	120	80	120	260	150	140	120	300	90	130	160	150	110	90	130	160	130	130	140	120	150	90	100
D_abrahamii_RRN0034	100	110	110	80	100	90	120	100	140	70	90	140	70	30	120	120	130	140	70	150	170	140	140	90	80	120	100	120	90	90
D_abrahamii_SH0681	110	100	100	140	130	120	110	100	120	100	100	120	120	110	120	150	140	110	100	120	120	130	120	130	150	140	140	120	100	120
D_baronii_RBE2254	100	100	120	80	80	80	80	100	100	80	140	100	80	90	120	100	100	80	90	110	100	90	100	100	80	100	100	110	70	100
D_baronii_RBE2257	100	100	100	130	90	120	120	140	120	100	110	120	140	90	140	150	160	120	130	150	140	90	140	150	120	70	150	120	140	150
D_baronii_RBE2469	100	150	120	120	130	130	160	120	180	180	120	120	140	150	120	100	150	220	90	140	100	140	270	120	120	110	110	100	140	120
D_baronii_RBE2624	120	130	120	130	100	170	150	100	100	100	140	110	120	150	110	90	120	150	90	90	170	100	150	120	120	100	90	100	150	110
D_baronii_RNH1177	140	90	70	100	90	80	120	130	80	120	70	120	110	120	70	120	90	110	150	140	90	100	80	110	120	40	100	80	150	160
D_bathiei_KAD0143	190	110	170	130	90	160	140	60	50	190	140	180	40	120	160	100	140	90	50	70	140	290	320	100	120	290	180	240	300	250
D_bathiei_KAD0147	120	170	70	160	100	120	110	50	160	130	180	120	160	80	210	110	70	180	160	200	100	120	230	190	40	120	190	250	170	140
D_bathiei_KAD0150	260	80	90	280	120	170	110	240	110	220	120	140	320	150	140	350	370	270	120	40	80	260	240	200	90	130	280	70	300	130
D_bathiei_KAD0153	60	190	110	120	200	60	220	140	120	50	110	120	60	70	110	160	200	50	150	50	130	150	250	100	110	50	110	130	180	100
D_bathiei_RAV0097	130	130	120	140	120	110	130	120	140	130	140	110	130	120	150	150	120	110	120	120	140	150	100	110	110	100	100	180	170	150
D_chlorocarpa_CR7390	260	100	290	280	60	90	260	190	90	170	290	200	290	250	280	80	30	300	290	270	360	310	60	100	340	120	220	240	310	30
D_chlorocarpa_CR7422	140	90	50	23	30	110	240	250	100	70	80	60	110	110	160	120	100	90	90	100	130	120	140	60	130	190	120	240	90	320
D_chlorocarpa_RIR2903	105	95	145	100	70	235	285	230	225	225	295	370	375	295	280	100	115	170	145	120	145	100	160	120	100	260	260	480	100	190
D_chlorocarpa_RIR2904	230	355	240	275	220	320	235	325	175	125	90	75	125	89	110	120	155	135	95	120	185	135	75	125	120	125	135	140	105	135
D_chlorocarpa_SH0741	120	150	210	280	110	130	130	150	140	150	120	150	130	150	160	130	110	150	170	150	100	130	130	120	110	100	110	100	260	130
D_davidii_RIR3351	150	90	140	120	90	60	140	120	40	140	120	110	100	160	120	180	90	110	160	130	120	130	150	120	250	80	50	70	100	90
D_davidii_RIR3352	160	140	130	300	100	150	240	170	70	80	150	90	170	170	100	250	40	270	120	400	260	300	120	300	120	350	390	60	50	60
D_davidii_RIR3353	300	210	60	110	110	260	180	120	130	180	160	310	130	90	200	110	40	60	140	100	130	160	160	130	150	200	100	190	210	290
D_davidii_RIR3571	90	110	80	70	100	50	60	160	70	110	150	40	50	110	90	60	100	80	70	130	30	100	80	110	90	60	100	40	120	130
D_davidii_SH0733	220	90	100	110	150	100	90	150	140	110	90	140	120	150	160	120	140	150	80	90	120	130	110	70	120	260	140	110	120	130
D_greveana_RIR2421	160	270	80	150	140	140	130	170	140	140	130	100	130	120	130	120	130	180	150	150	130	125	140	90	140	225	280	100	120	140
D_greveana_RIR2913	150	170	140	150	150	270	170	270	140	160	320	250	170	150	160	150	100	140	160	120	150	140	100	200	160	120	150	140	150	140	120	110
D_greveana_RIR2914	240	120	125	170	120	120	140	130	160	120	120	120	180	120	90	240	200	180	130	130	90	130	130	120	120	140	120	110	120	110	110	120
D_greveana_RIR2915	120	130	150	90	180	100	140	140	210	90	130	70	200	180	110	90	120	130	150	220	160	120	80	190	150	110	150	80	140	110	110	150
D_greveana_RIR3214	130	210	135	130	60	200	290	120	220	150	120	95	270	120	150	145	170	240	90	180	160	180	100	110	125	135	120	90	100	160
D_greveana_RIR3215	150	120	195	120	110	280	105	150	105	145	290	80	120	85	120	125	115	90	220	90	115	110	145	90	100	135	125	130	130	120
D_greveana_RIR3219	160	150	160	150	230	180	160	170	100	95	80	225	130	150	290	120	100	125	130	140	110	115	160	140	115	120	120	140	140	130
D_greveana_SH0750	110	120	130	110	120	130	150	140	250	140	140	130	110	130	150	130	300	200	150	100	140	110	100	120	110	130	150	160	110	150	120	110
D_oronjiae_ANS0012	90	80	110	100	60	100	90	130	90	100	80	40	30	80	130	60	150	100	90	110	120	80	100	90	60	70	90	130	170	110
D_oronjiae_ANS0024	100	160	120	100	80	130	150	80	130	120	150	130	90	190	80	100	110	130	100	130	60	110	70	270	70	50	110	80	120	140
D_oronjiae_ANS0026	70	30	150	110	190	90	120	130	100	110	130	110	100	60	110	110	80	110	100	70	110	130	120	100	120	100	120	110	100	90
D_oronjiae_ANS0028	110	150	120	120	150	120	130	110	120	100	140	120	110	120	120	110	120	120	70	160	170	110	120	110	100	110	110	100	140	120
D_oronjiae_KAD0052	130	140	120	100	100	120	110	110	120	130	110	120	130	130	100	120	130	120	130	130	140	130	120	120	150	100	260	140	170	120
D_oronjiae_SH0690	100	100	100	100	100	100	100	120	90	90	90	100	100	100	100	100	90	80	80	100	80	80	90	100	100	100	100	100	100	100
D_lemurica_CR6514	230	140	130	160	120	100	110	110	110	160	230	110	110	120	150	450	110	100	190	130	240	120	130	260	350	350	100	120	320	190
D_lemurica_CR6519	100	120	220	110	120	90	110	150	110	110	120	110	110	110	120	110	100	120	110	120	110	110	110	110	130	110	110	120	90	100
D_lemurica_CR7441	100	90	80	100	120	100	140	110	90	150	120	110	100	90	60	110	120	40	70	100	90	120	70	100	50	70	90	110	120	100
D_lemurica_RIR3384	205	240	110	80	200	150	140	90	220	160	90	130	155	100	100	100	160	100	110	140	100	200	110	180	120	180	50	50	140	90
D_lemurica_RIR3387	260	130	140	170	150	170	70	190	90	100	180	180	200	210	60	140	160	180	120	150	150	60	120	105	90	180	80	190	80	110
D_lemurica_RIR3388	100	120	120	180	100	110	160	100	110	130	120	120	130	130	150	140	130	120	90	100	120	100	150	110	120	120	110	120	110	180
D_lemurica_RIR3419	120	120	110	130	110	110	100	110	120	110	90	110	120	120	110	90	115	120	90	120	125	110	110	130	140	80	100	70	120	110
D_lemurica_RIR3420	110	130	100	120	120	90	110	110	100	100	90	125	80	115	90	100	90	110	110	110	170	85	75	110	100	110	80	125	80	110
D_monticola_KAD0066	220	115	120	100	130	150	120	150	120	120	130	190	130	140	220	80	110	100	130	170	140	145	150	120	140	140	200	150	150	130	220	120
D_monticola_KAD0069	180	130	160	120	110	140	150	150	120	160	200	110	150	150	140	150	130	170	130	130	140	150	160	120	130	150	150	130	100	110	130	150
D_monticola_KAD0089	150	170	150	170	180	220	180	140	130	190	160	160	150	180	160	190	160	190	160	150	150	150	200	170	110	210	160	170	190	190	200	180
D_monticola_KAD0092	140	190	180	160	140	140	150	180	160	180	150	150	160	150	140	190	160	110	110	140	160	170	190	150	180	150	150	150	140	160	180	130
D_monticola_KAD0094	155	140	130	140	155	190	130	150	100	150	150	140	90	140	140	130	150	125	175	145	120	140	170	180	150	150	140	150	170	160	130	150
D_normandii_RBE2486	250	210	210	240	200	160	150	210	220	220	250	240	260	210	200	160	120	220	260	220	250	230	220	250	230	220	150	150	190	180
D_normandii_RBE2614	200	180	170	200	170	220	200	220	160	210	200	190	200	180	160	200	200	200	110	180	270	200	200	200	200	200	210	170	220	200
D_normandii_RZK8223	220	140	140	260	200	150	130	140	130	110	150	190	80	280	180	150	100	140	130	100	300	180	150	70	180	110	110	150	100	220
D_normandii_RZK8224	170	150	180	290	200	250	220	230	420	360	430	220	300	460	200	180	470	150	420	460	120	200	700	200	220	300	220	200	210	170
D_normandii_RZK8375	150	110	160	50	100	100	90	150	70	150	120	60	150	190	70	160	140	120	130	140	160	180	150	70	40	150	160	160	150	120
D_obtusa_RIR2441	100	110	100	110	110	100	120	100	100	110	90	100	110	110	110	120	120	90	100	90	100	90	100	100	90	100	100	100	100	100
D_obtusa_RIR2447	110	120	110	130	110	110	100	110	120	100	130	110	110	100	100	90	110	120	150	100	130	110	110	110	140	130	110	110	110	110
D_obtusa_RIR2834	110	120	140	120	105	110	100	90	100	90	100	100	90	110	105	120	120	110	120	125	110	110	130	110	100	90	100	100	70	100
D_obtusa_RIR2835	110	115	120	120	120	115	100	100	100	85	105	100	120	120	100	100	120	120	110	70	120	120	120	115	100	90	125	120	120	120
D_obtusa_RIR2842	100	120	100	110	125	100	100	100	140	120	140	120	120	100	100	150	140	150	120	140	130	120	120	130	130	120	100	120	120	140
D_orientalis_KAD0200	160	90	150	110	60	150	120	150	100	100	120	150	140	150	140	110	100	120	170	110	180	180	100	130	110	120	160	150	160	180
D_orientalis_RFN0021	110	90	200	120	130	130	120	130	150	200	170	200	210	160	190	200	320	140	110	120	130	160	140	180	160	180	190	130	140	180
D_orientalis_RFN0035	90	110	130	110	140	100	110	180	120	180	250	180	100	120	120	130	130	140	120	140	180	120	70	150	110	40	220	160	140	150
D_orientalis_RZK8269	130	160	120	120	110	130	120	160	160	90	100	90	70	170	150	140	130	140	110	110	100	110	340	190	150	150	140	150	140	120
D_orientalis_SAN0028	170	80	130	140	100	210	70	140	140	110	160	190	220	130	105	120	120	140	150	100	120	100	120	130	140	150	130	80	140	110
D_orientalis_SAN0031	160	150	150	100	130	90	100	80	180	200	120	130	210	130	100	120	130	60	150	240	210	130	120	110	140	130	130	120	90	120
D_pseudobaronii_ALR2439	90	60	140	150	100	200	140	130	90	40	130	210	150	60	100	120	140	160	50	80	110	130	100	70	130	90	60	150	110	100
D_pseudobaronii_ALR2440	140	50	120	100	170	120	160	50	90	130	170	150	190	160	70	160	170	150	90	130	140	150	170	100	120	170	40	170	210	160
D_pseudobaronii_ALR2446	140	130	130	130	100	100	120	130	130	130	130	120	130	140	130	130	130	100	130	160	180	130	150	160	110	130	110	120	160	120
D_pseudobaronii_RRN0026	320	160	120	160	150	240	200	30	190	130	250	130	270	240	140	110	120	100	50	260	90	300	340	130	140	130	160	130	180	110
D_pseudobaronii_RRN0027	120	260	50	250	290	130	240	260	80	110	100	150	40	320	140	240	300	110	40	70	220	270	260	170	60	150	190	280	230	180
D_purpurascens_RIR2410	300	140	120	110	130	270	300	120	130	140	130	140	100	120	150	130	120	130	120	120	140	100	120	250	150	290	300	80	130	130
D_purpurascens_RIR3335	120	170	260	270	90	70	100	120	240	120	130	120	110	110	120	130	340	110	120	150	90	170	90	100	90	220	120	110	220	190
D_purpurascens_RIR3336	480	280	130	110	260	130	110	110	260	280	120	160	60	160	130	260	280	120	90	30	250	250	150	140	100	140	120	500	130	120
D_purpurascens_RIR3337	150	230	120	80	80	130	110	150	120	70	100	100	80	140	140	260	100	110	60	120	100	105	90	80	110	100	80	100	110	100
D_purpurascens_ROZ0023	90	120	110	110	140	120	210	110	150	90	120	105	220	110	120	110	140	110	100	120	90	120	90	200	130	120	140	150	90	290
D_purpurascens_ROZ0024	240	100	180	130	180	140	120	80	60	130	340	200	110	120	70	200	120	180	100	120	160	230	160	180	120	125	130	140	140	160
D_razakamalalae_EME0023	100	100	140	90	110	150	120	100	130	140	100	250	120	130	120	120	130	120	140	120	100	100	120	120	120	130	130	130	100	100
D_razakamalalae_RFN0001	130	150	80	90	90	110	130	130	140	150	150	150	140	130	160	100	100	150	110	100	130	120	110	90	100	70	100	70	100
D_razakamalalae_RZK8035	220	130	160	120	160	320	230	120	430	190	100	160	140	170	140	110	130	110	210	105	190	130	130	280	90	160	100	90	120	170
D_razakamalalae_RZK8040	130	130	110	80	115	90	110	110	90	105	115	150	100	110	90	100	60	120	90	80	150	130	110	110	90	150	110	110	120	140
D_razakamalalae_SAN0023	140	130	70	120	130	50	160	80	150	80	110	120	130	140	170	50	60	150	170	140	80	120	140	120	90	170	130	140	180	60
D_razakamalalae_SAN0026	150	120	90	110	80	170	120	80	100	150	160	120	130	110	140	100	160	100	110	80	180	90	160	130	150	140	130	100	90	80
D_razakamalalae_SFR0255	120	150	25	115	140	130	200	120	100	100	100	110	110	90	130	130	110	120	80	110	120	110	100	70	125	130	120	90	135	115
D_urschii_ALR2443	240	80	120	180	90	150	190	90	100	150	200	180	100	100	210	150	100	120	130	160	350	230	110	300	150	110	90	150	110	100
D_urschii_RIR2458	110	160	140	160	120	110	130	150	110	150	150	120	100	200	140	130	100	100	150	120	220	120	130	80	120	180	130	150	160	320
D_urschii_RRN0043	100	110	110	80	100	90	120	100	140	70	90	140	70	30	120	120	130	140	70	150	170	140	140	90	80	120	100	120	90	90
D_urschii_RRN0044	180	40	140	90	100	110	250	60	100	180	160	130	160	220	140	70	210	160	130	100	330	150	100	120	120	120	140	110	180	90
D_urschii_RRN0045	200	120	110	50	130	290	120	160	80	110	120	130	110	100	160	60	100	110	250	120	90	120	120	90	110	110	130	130	150	310
[truncated: 11 more columns]

## Sheet: RMM
id	M1	M2	M3	M4	M5	M6	M7	M8	M9	M10	M11	M12	M13	M14	M15	M16	M17	M18	M19	M20	M21	M22	M23	M24	M25	M26	M27	M28	M29	M30	M31	M32	M33	M34	M35	M36	M37	M38	M39	M40	M41	M42	M43	M44	M45	M46	M47	M48	M49
D_abrahamii_KAD0058	10	11	8	10	9	9	10	10	11	9	8	9	8	10	8	9	9	8	9	9	8	10	10	8	9	8	10	9	8	8	9	11	11	8	9	11	10	11	10	12	9	9	9	11	12	9	10	10	10
D_abrahamii_KAD0059	11	12	11	12	12	11	11	10	11	11	13	13	11	11	12	11	10	10	10	10	12	11	10	12	11	10	13	12	11	12
D_abrahamii_KAD0060	10	10	10	10	10	10	10	10	10	10	12	10	13	10	10	9	10	9	9	9	10	9	10	9	11	10	11	12	8	14	10	11	12	12	9	12	12	10	11	10	9	10	10	11	10	11	10	12	9
D_abrahamii_RBE2765	10	10	9	10	8	9	9	9	8	9	9	8	9	9	11	9	11	11	10	9	8	8	9	10	11	6	7	8	9	6
D_abrahamii_RRN0033	14	13	16	14	12	14	15	14	13	16	14	13	13	13	12	14	14	14	17	14	14	12	14	11	16	14	13	14	13	13
D_abrahamii_RRN0034	12	14	14	14	13	12	12	14	14	13	15	14	13	15	15	16	14	14	17	18	13	14	14	13	13	12	12	14	15	17
D_abrahamii_SH0681	12	12	12	11	13	13	11	10	12	14	12	13	14	12	10	10	10	10	11	10	10	12	11	11	13	10	12	13	12	10
D_baronii_RBE2254	10	10	9	11	13	10	12	10	11	12	12	11	10	10	12	11	10	10	11	11	10	11	11	13	12	13	16	12	14	12
D_baronii_RBE2257	12	12	14	12	12	12	12	12	12	11	11	12	13	12	12	12	13	12	12	13	14	12	14	9	12	12	11	15	15	13
D_baronii_RBE2469	14	14	16	14	14	15	14	15	15	14	15	15	14	14	13	14	13	14	16	13	15	17	14	14	15	16	14	15	14	13
D_baronii_RBE2624
D_baronii_RNH1177	13	14	12	11	12	12	14	14	14	14	13	13	14	13	14	13	13	13	11	13	13	13	14	14	13	13	14	13	14	12
D_bathiei_KAD0143	12	11	11	11	11	12	10	11	11	12	11	11	12	9	10	9	11	11	8	11	11	12	11	11	11	11	12	10	11	10
D_bathiei_KAD0147	9	10	10	11	11	11	10	12	9	11	11	11	11	11	12	11	11	9	10	10	11	11	11	10	12	9	11	11	11	8
D_bathiei_KAD0150	12	11	10	12	8	9	13	11	11	13	10	10	11	9	10	12	11	10	12	8	9	13	11	11	10	10	10	11	9	10
D_bathiei_KAD0153	10	14	13	12	13	8	11	10	10	10	10	10	11	9	15	10	14	13	12	13	8	11	10	10	10	10	10	11	9	15
D_bathiei_RAV0097	9	9	11	10	11	11	9	10	10	10	9	8	9	10	12	11	9	10	10	9	9	9	9	9	9	10	10	8	9	10
D_chlorocarpa_CR7390	10	11	12	12	11	13	10	11	11	11	11	9	11	11	12	11	11	12	11	11	11	14	11	11	10	11	11	11	10
D_chlorocarpa_CR7422	8	7	10	11	12	8	11	10	12	10	11	11	9	8	9	12	7	11	11	11	11	11	10	7	8	10	11	11	11
D_chlorocarpa_RIR2903	9	10	10	10	10	11	11	11	9	10	10	10	8	9	8	7	8	10	10	10	10	9	10	11	10	11	11	10	10	10
D_chlorocarpa_RIR2904	11	11	12	12	11	11	13	11	11	11	12	12	12	12	12	12	12	12	12	12	11	12	11	12	12	12	12	12	11	11
D_chlorocarpa_SH0741	12	13	12	9	9	10	10	10	10	10	9	10	9	10	11	9	9	9	10	14	13	10	10	9	10	10	10	11	10	10
D_davidii_RIR3351	11	9	11	10	12	11	11	11	8	8	12	11	6	10	10	8	12	11	9	10	11	9	9	11	10	11	9	12	13	12
D_davidii_RIR3352	9	8	7	8	9	11	10	10	10	10	10	9	10	12	10	10	8	9	9	10	9	10	10	9	9	9	9	10	10	9
D_davidii_RIR3353	12	10	10	9	10	10	10	8	9	10	8	9	8	9	13	12	11	11	13	10	12	11	11	9	10	10	10	10	10	8
D_davidii_RIR3571	12	15	14	12	12	12	13	15	14	14	15	14	13	13	14	14	12	15	13	13	13	14	13	12	14	11	14	12	11	11
D_davidii_SH0733	13	12	10	9	10	10	9	10	10	8	9	10	8	8	10	12	10	10	11	10	11	10	9	10	10	10	11	9	9	9
D_greveana_RIR2421	14	10	12	11	10	12	9	16	13	16	10	10	12	14	11	11	9	11	13	10	10	12	14	10	12	7	11	12	13	12
D_greveana_RIR2913	12	10	13	13	13	14	12	11	16	12	12	13	14	13	13	10	10	10	10	11	12	13	11	11	11	12	12	13	12	12	9
D_greveana_RIR2914	13	12	10	12	11	9	15	14	12	12	10	9	11	10	13	12	12	11	12	14	12	12	13	12	12	11	9	10	12	11	10
D_greveana_RIR2915	9	13	11	12	10	11	10	11	10	12	12	11	10	12	11	12	10	10	11	12	10	10	14	12	10	13	9	13	10	12	11
D_greveana_RIR3214	11	10	14	7	9	8	10	10	9	7	9	8	10	8	6	7	7	7	8	9	9	7	8	9	12	11	9	10	6	9
D_greveana_RIR3215	10	10	9	11	10	11	9	9	8	10	10	11	8	8	9	10	10	10	11	10	10	10	10	10	10	11	11	10	10	10
D_greveana_RIR3219	15	18	14	14	13	13	11	15	11	13	11	12	14	15	13	15	13	10	13	16	15	12	12	8	16	18	8	12	14	12
D_greveana_SH0750	10	10	10	10	11	11	9	11	9	9	9	9	9	11	12	13	11	11	10	10	10	10	12	10	9	12	10	10	11	10	9
D_oronjiae_ANS0012	12	13	12	12	13	12	14	12	14	13	10	12	11	12	12	13	13	13	12	11	13	13	12	12	14	14	11	12	12	12
D_oronjiae_ANS0024	11	10	13	12	13	13	15	11	12	13	11	14	13	13	15	13	13	13	13	11	12	15	13	15	12	13	16	11	13	12
D_oronjiae_ANS0026	14	13	13	13	10	12	14	11	12	13	12	16	13	12	15	14	15	16	13	14	13	13	13	14	14	17	14	14	13	14
D_oronjiae_ANS0028	14	14	12	13	11	13	13	13	13	13	12	16	12	10	13	11	13	14	10	12	12	13	12	12	12	11	12	12	12	12
D_oronjiae_KAD0052	13	13	12	12	13	11	10	14	12	11	14	13	14	13	12	12	12	13	12	13	14	13	14	14	12	12	11	12	11	12
D_oronjiae_SH0690	15	10	13	15	14	12	14	15	14	15	14	14	15	13	14	14	16	14	14	16	13	14	12	12	13	13	14	13	16	13
D_lemurica_CR6514	10	10	10	11	10	8	10	11	10	10	11	8	10	10	10	10	11	10	10	10	10	10	11	11	12	10	11	10	10	10
D_lemurica_CR6519	10	11	12	12	11	12	11	13	12	11	10	11	11	11	10	10	11	10	11	11	11	13	14	10	9	12	8	12	13	10
D_lemurica_CR7441	14	14	13	13	15	13	13	13	14	12	12	14	14	14	12	12	14	13	13	12	11	14	11	14	12	13	13	13	12	12
D_lemurica_RIR3384	13	11	9	10	10	10	11	11	12	12	10	12	11	12	12	13	12	11	10	13	12	11	12	12	10	11	10	10	11	10
D_lemurica_RIR3387	10	13	7	9	11	11	8	12	10	10	7	12	11	11	11	12	12	11	12	11	14	10	8	9	11	10	9	10	10	11
D_lemurica_RIR3388	12	12	10	10	11	11	10	12	9	11	9	10	12	9	12	10	11	9	12	11	11	13	12	9	13	12	15	11	12	12
D_lemurica_RIR3419	10	11	12	12	11	12	11	13	12	11	10	11	11	11	10	10	11	10	11	11	11	13	14	10	9	12	8	12	13	10
D_lemurica_RIR3420	16	12	12	12	12	13	15	14	13	13	11	13	13	15	15	12	12	13	12	16	11	13	13	12	12	13	12	12	12	12
D_monticola_KAD0066	13	10	8	12	14	10	13	13	11	10	12	13	10	15	10	7	13	12	11	10	11	10	10	10	14	14	12	12	8	9	10	11
D_monticola_KAD0069	16	18	21	13	20	14	22	25	11	22	22	19	18	22	18	19	13	23	15	16	19	17	12	17	11	11	16	18	21	17	18	18
D_monticola_KAD0089	11	12	8	10	9	13	9	12	13	11	15	13	11	11	9	12	10	10	14	9	10	10	15	10	10	9	11	13	10	12	13	13
D_monticola_KAD0092	19	10	18	13	13	18	12	15	15	19	16	9	17	16	11	15	18	17	12	18	20	16	11	15	14	18	11	9	13	15	16	17
D_monticola_KAD0094	9	14	14	11	15	15	17	10	13	15	18	17	17	19	15	10	12	13	14	15	16	17	17	15	10	12	11	12	14	11	9	10
D_normandii_RBE2486
D_normandii_RBE2614
D_normandii_RZK8223	12	12	14	13	14	13	12	12	13	8	10	10	12	12	12	13	10	11	10	11	10	11	10	13	12	13	12	14	12	11
D_normandii_RZK8224
D_normandii_RZK8375
D_obtusa_RIR2441	16	14	16	18	19	20	17	20	20	20	17	21	16	16	16	17	17	18	17	17	20	18	21	16	18	17	19	19	19	20
D_obtusa_RIR2447	17	18	16	14	14	16	16	17	20	19	18	18	15	18	17	16	18	16	17	18	17	18	17	17	20	19	19	20	17	17
D_obtusa_RIR2834	15	18	17	17	17	17	17	18	17	17	17	17	17	16	17	17	17	17	17	17	17	18	17	17	17	17	17	15	16	17
D_obtusa_RIR2835	17	15	15	16	15	16	16	15	16	16	16	16	16	15	16	16	16	16	15	15	15	16	15	15	16	16	16	16	16	16
D_obtusa_RIR2842	16	16	16	16	16	16	15	15	17	15	15	15	15	15	15	15	15	15	16	16	16	16	16	16	15	17	16	16	16	16
D_orientalis_KAD0200	16	13	13	11	13	14	14	12	12	12	12	14	11	12	8	13	11	14	12	12	13	13	12	11	11	13	12	13	11	11
D_orientalis_RFN0021	15	12	15	13	12	14	15	12	12	10	13	14	15	14	14	13	13	11	12	14	13	12	13	12	15	13	11	13	15	14
D_orientalis_RFN0035	14	14	15	15	15	15	12	13	12	16	13	14	13	15	14	15	17	15	16	14	14	15	13	13	15	16	15	14	12	13
D_orientalis_RZK8269	13	11	14	12	10	11	11	14	10	10	12	11	14	14	12	9	11	13	12	13	14	13	12	13	13	12	11	14	13	13
D_orientalis_SAN0028	10	10	8	7	10	9	9	10	7	8	7	9	10	7	8	8	10	10	9	7	10	10	10	9	10	7	8	9	10	9
D_orientalis_SAN0031	15	13	14	9	13	10	15	15	14	11	13	12	11	11	9	9	11	12	11	12	11	13	14	13	15	13	11	13	11	12
D_pseudobaronii_ALR2439	16	12	16	15	13	13	12	13	14	14	13	15	15	12	13	13	10	11	10	16	14	15	15	14	14
D_pseudobaronii_ALR2440	13	12	12	13	12	12	12	12	10	14	13	15	11	15	14	13	13	15	15	14	13	15	15	14	11	12	12	12	8
D_pseudobaronii_ALR2446	8	9	10	9	7	8	10	8	7	7	9	8	9	10	8	8	8	7	8	9	8	8	9	8	9	8	9	8	10
D_pseudobaronii_RRN0026	11	14	12	15	10	12	13	11	12	10	9	12	10	11	10	12	8	7	12	9	12	10	11	12	12	9	10	11	10
D_pseudobaronii_RRN0027	12	10	10	10	9	9	10	11	13	13	12	8	11	14	12	10	13	11	14	13	9	11	11	11	11	9	7	8	11	13
D_purpurascens_RIR2410	10	9	10	9	9	13	10	11	11	11	11	10	10	11	11	12	11	10	11	12	10	11	11	11	12	10	11	12	13	11
D_purpurascens_RIR3335	9	8	9	11	10	9	10	9	10	8	10	9	8	11	8	8	9	9	8	8	9	9	10	9	9	10	9	9	7	11
D_purpurascens_RIR3336	10	8	9	10	10	9	10	8	8	9	10	10	11	11	10	10	11	10	11	10	11	8	8	8	10	10	11	9	9
D_purpurascens_RIR3337	12	13	12	14	13	13	15	13	15	12	15	13	14	13	13	15	10	13	15	15	14	11	12	13	14	15	14	16	13	12
D_purpurascens_ROZ0023	8	9	9	8	9	9	11	8	8	9	12	12	10	9	10	8	9	10	10	10	7	8	10	10	11	11	11	10	8	8
D_purpurascens_ROZ0024	10	9	9	11	10	12	11	8	9	11	10	11	10	10	10	8	8	9	9	8	10	9	9	13	12	11	11	10	8
D_razakamalalae_EME0023	11	10	12	13	11	10	15	9	11	12	9	8	13	13	13	11	10	10	10	12	11	14	15	12	11	12	12	12	10	15
D_razakamalalae_RFN0001	15	13	14	14	14	14	14	14	14	13	13	13	14	14	13	13	14	14	14	13	14	14	12	14	14	12	11	12	12	14
D_razakamalalae_RZK8035	16	18	19	22	16	19	20	20	18	16	16	16	14	18	18	22	18	20	17	18	20	20	14	20	20	18	18	20	18	16
D_razakamalalae_RZK8040	15	16	19	15	19	18	16	19	17	20	18	22	19	21	19	19	18	17	15	16	19	19	21	22	20	19	19	21	18	19
D_razakamalalae_SAN0023	12	13	11	10	12	13	11	11	10	14	14	13	14	10	11	10	11	11	12	14	14	13	14	10	11	10	11	11	12	4
D_razakamalalae_SAN0026	13	15	14	14	14	16	14	13	14	15	15	15	14	13	16	16	19	19	14	14	16	14	13	14	15	15	15	14	18	15
D_razakamalalae_SFR0255	14	8	13	12	13	9	15	16	11	16	12	14	14	15	14	15	15	15	13	13	12	12	13	13	16	15	15	14	13	12
D_urschii_ALR2443	11	11	12	11	12	11	12	12	15	11	10	12	13	13	12	10	10	10	12	11	11	11	14	13	11	13	11	15	14	12
D_urschii_RIR2458	10	11	11	12	11	12	11	13	11	11	11	15	12	11	9	10	12	12	12	14	10	12	12	12	12	11	10	12	12	10
D_urschii_RRN0043	15	14	15	17	13	15	15	15	16	15	16	15	16	15	13	15	14	14	16	14	15	15	14	14	14	14	17	16	14	14
D_urschii_RRN0044	15	15	18	16	14	14	17	16	13	13	14	13	12	13	14	12	13	13	14	15	15	12	14	14	12	12	13	14	15	14
D_urschii_RRN0045	14	16	15	16	13	16	12	13	14	14	14	15	15	13	14	17	14	14	13	14	14	15	15	14	11	16	12	14	12	12
[truncated: 11 more columns]

## Sheet: NCR
id	M1	M2	M3	M4	M5	M6	M7	M8	M9	M10	M11	M12	M13	M14	M15	M16	M17	M18	M19	M20	M21	M22	M23	M24	M25	M26	M27	M28	M29	M30	M31	M32	M33	M34	M35	M36	M37	M38	M39	M40	M41	M42	M43	M44	M45	M46	M47	M48	M49
D_abrahamii_KAD0058	18	11	9	4	17	22	7	7	4	19	16	23	21	16	12	22	13	5	7	25	24	10	11	16	13	7	4	4	20	16	12	6	13	10	9	7	5	14	6	4	8	20	13	6	6	11	11	4	8
D_abrahamii_KAD0059	32	10	10	34	13	11	7	33	8	16	26	15	12	10	20	33	30	10	10	33	8	13	9	12	15	6	13	8	4	23
D_abrahamii_KAD0060	19	10	4	6	13	10	5	3	26	12	4	8	13	7	9	15	13	7	29	13	25	15	12	5	10	10	8	9	19	23	14	4	5	7	2	6	14	6	6	7	4	8	3	4	6	5	9	14	8
D_abrahamii_RBE2765	8	9	2	4	4	10	8	5	2	3	5	5	13	11	4	4	6	4	14	4	5	19	4	3	4	5	5	4	15	3
D_abrahamii_RRN0033	11	4	5	13	5	12	6	15	7	4	16	27	6	20	20	17	3	5	13	12	16	18	21	6	20	4	6	26	9	10
D_abrahamii_RRN0034	5	6	6	7	5	4	7	8	6	6	7	7	3	6	6	3	5	7	6	6	2	7	6	8	6	6	6	7	6	8
D_abrahamii_SH0681	13	10	7	8	16	15	8	9	12	3	7	8	14	15	12	14	9	16	16	10	12	13	16	8	14	6	9	8	10	9
D_baronii_RBE2254	6	6	3	4	9	3	5	7	6	2	8	6	7	12	4	5	7	5	9	7	7	9	6	6	5	5	5	5	7	4
D_baronii_RBE2257	6	5	4	5	7	5	4	6	7	5	5	8	6	5	6	6	5	6	5	5	6	6	7	5	6	3	3	5	5	6
D_baronii_RBE2469	18	10	8	11	7	12	8	8	6	6	5	22	11	4	6	7	6	6	6	9	6	6	8	7	7	9	10	23	6	10
D_baronii_RBE2624	4	4	6	2	1	6	6	3	3	8	10	8	5	6	5	2	4	3	1	3	5	7	6	2	4	7	6	4	5	9
D_baronii_RNH1177	9	12	9	10	9	8	5	10	9	3	6	12	8	14	9	2	8	9	10	7	13	10	11	6	8	5	9	11	12	7
D_bathiei_KAD0143	8	8	6	8	6	8	8	16	10	7	6	7	17	5	11	15	10	7	7	6	7	7	6	19	13	10	9	8	8	7	3
D_bathiei_KAD0147	9	5	5	4	4	7	6	6	6	7	8	9	6	5	7	6	6	7	9	6	12	9	8	8	14	6	6	6	12	19	3
D_bathiei_KAD0150	6	6	4	8	6	10	3	9	9	6	6	10	6	4	12	4	9	6	5	10	5	6	6	7	4	4	12	10	8	15	5
D_bathiei_KAD0153	4	7	4	6	8	9	4	4	5	9	8	6	6	7	7	6	7	6	3	7	6	7	8	9	8	5	5	9	11	6	3
D_bathiei_RAV0097	7	6	5	5	5	5	6	5	5	5	5	5	5	7	6	7	5	6	6	7	6	5	5	4	6	6	6	6	6	7	3
D_chlorocarpa_CR7390	7	26	3	5	28	20	4	33	4	35	7	12	30	7	8	16	26	17	3	21	11	8	30	2	21	15	30	43	28	24	19	35	26	24	15	16	17	18	20	26	23	31	22	24	28	33	22	17	12
D_chlorocarpa_CR7422	12	13	14	12	5	10	6	2	3	4	5	10	10	5	8	4	5	20	2	3	4	3	2	4	5	9	6	5	6
D_chlorocarpa_RIR2903	6	6	7	4	10	11	10	6	8	9	9	11	12	12	12	22	26	14	13	31	19	22	16	21	15	6	14	12	10
D_chlorocarpa_RIR2904	5	6	6	7	6	6	6	8	8	9	6	25	13	9	13	11	11	26	17	7	7	10	4	15	8	8	6	8	11
D_chlorocarpa_SH0741	9	11	13	15	15	6	25	26	13	11	13	16	11	16	13	11	25	8	6	10	16	11	6	13	13	17	28	13	13
D_davidii_RIR3351	10	12	11	7	6	5	6	2	16	10	15	6	17	9	4	11	6	9	8	9	7	6	9	7	10	5	6	14	10	4
D_davidii_RIR3352	10	3	15	4	19	8	8	5	8	9	6	6	18	11	24	3	4	29	28	13	4	40	30	6	22	30	3	15	7	10
D_davidii_RIR3353	6	6	6	7	16	6	9	6	10	8	5	8	14	10	8	6	14	3	10	8	7	6	16	13	27	19	14	18	4	10
D_davidii_RIR3571	2	9	4	5	3	7	8	3	12	5	6	4	9	3	11	7	5	4	8	6	10	7	2	9	4	11	5	6	9	3
D_davidii_SH0733	9	10	5	3	7	13	16	5	25	2	6	3	18	13	7	3	23	9	14	15	17	7	12	28	16	16	7	6	31	13
D_greveana_RIR2421	7	11	13	13	13	17	5	10	15	12	6	14	11	7	4	20	20	12	25	11	11	12	6	13	9	8	11	12	6	10	13	8
D_greveana_RIR2913	8	8	8	6	20	4	8	7	8	14	7	8	10	8	8	11	8	16	7	9	10	6	7	19	7	7	8	14	9	17	7	11
D_greveana_RIR2914	11	4	9	7	6	5	7	7	7	8	8	10	8	7	5	7	7	8	3	7	7	4	8	9	8	12	14	4	12	10	7	8
D_greveana_RIR2915	7	10	12	7	6	7	14	11	13	12	11	10	12	5	6	12	9	10	11	12	19	18	11	13	13	14	7	4	11	18	11	13
D_greveana_RIR3214	18	12	4	10	6	12	8	14	34	28	7	6	24	14	6	35	14	30	15	29	16	8	27	11	36	27	18	17	41	9	8	8
D_greveana_RIR3215	9	8	11	10	11	10	10	8	12	12	4	10	13	11	12	7	10	10	8	9	12	12	12	16	12	10	6	10	16	31	5	17
D_greveana_RIR3219	11	12	11	8	10	9	12	11	14	16	15	16	10	23	23	14	15	12	11	11	7	5	8	7	10	12	11	12	8	13	4	10
D_greveana_SH0750	9	10	6	15	19	11	4	15	6	19	10	18	12	6	6	11	10	13	10	10	14	12	10	15	11	13	6	12	14	13	10	6
D_oronjiae_ANS0012	6	4	5	7	4	6	9	8	6	6	5	3	7	6	4	4	5	6	6	5	6	4	4	11	6	3	10	5	5	6
D_oronjiae_ANS0024	7	6	7	11	8	6	4	6	14	4	11	3	8	13	5	8	14	5	11	7	11	6	2	7	11	6	8	3	4	10
D_oronjiae_ANS0026	4	8	2	6	9	11	7	10	6	7	8	7	11	5	3	5	25	8	10	15	12	13	8	5	6	4	11	10	7	5
D_oronjiae_ANS0028	6	8	5	6	7	10	6	8	8	7	7	6	6	8	9	10	12	9	5	8	9	8	6	5	4	7	7	8	8	6
D_oronjiae_KAD0052	11	5	9	12	9	13	3	4	11	12	17	15	9	10	12	5	8	10	6	15	7	8	4	7	14	8	14	14	13	6
D_oronjiae_SH0690	9	5	4	6	5	5	6	4	6	8	4	6	8	9	8	5	10	7	11	8	5	8	9	8	12	12	7	5	5	5
D_lemurica_CR6514	21	25	9	23	27	6	6	17	4	6	18	6	5	8	7	23	20	8	9	20	4	8	17	6	12	22	19	14	23	6
D_lemurica_CR6519	7	12	5	9	7	9	5	6	6	5	5	9	12	7	7	8	7	11	8	12	13	11	10	5	6	6	12	4	10	5
D_lemurica_CR7441	3	11	7	8	10	4	8	6	7	4	10	9	7	5	4	9	6	5	3	7	9	4	11	5	8	6	10	4	9	16
D_lemurica_RIR3384	7	21	7	9	14	7	9	9	12	5	13	5	19	14	12	5	5	8	16	6	7	13	9	12	13	10	6	12	3	6
D_lemurica_RIR3387	6	10	5	4	14	8	13	3	8	4	14	11	6	5	2	2	6	15	7	7	18	6	3	6	10	9	7	3	16	6
D_lemurica_RIR3388	6	4	9	5	7	5	4	5	5	5	6	7	6	10	10	4	7	8	5	8	7	9	9	7	5	12	7	10	5	5	9	5
D_lemurica_RIR3419	7	12	5	9	7	9	5	6	6	5	5	9	12	7	7	8	7	11	8	12	13	11	10	5	6	6	12	4	10	7
D_lemurica_RIR3420	11	7	7	10	6	6	10	7	5	6	7	8	6	9	10	8	4	4	6	8	10	7	6	6	8	6	7	7	3	10
D_monticola_KAD0066	12	20	13	12	13	8	12	10	10	18	13	11	11	11	11	15	9	14	24	13	11	13	13	11	11	13	9	14	15	7	9	7
D_monticola_KAD0069	13	10	11	14	11	15	11	9	14	18	6	13	9	12	15	12	14	12	12	10	6	12	10	12	15	12	10	12	11	11	13	11
D_monticola_KAD0089	10	10	13	12	20	13	12	11	11	16	12	9	9	12	11	11	9	12	9	10	16	12	11	10	14	13	10	13	11	11	9	11
D_monticola_KAD0092	14	10	10	11	9	12	9	7	9	9	12	9	8	12	10	13	13	11	22	14	13	11	13	13	13	14	11	13	12	11	16	14
D_monticola_KAD0094	11	5	15	14	12	10	8	11	5	12	10	15	13	10	10	11	10	12	12	9	8	7	12	12	10	13	13	12	4	8
D_normandii_RBE2486	8	9	8	9	9	9	7	5	9	8	9	7	9	9	11	8	3	7	7	9	9	4	7	8	7	7	7	10	8	8
D_normandii_RBE2614	7	6	6	6	8	10	6	7	6	7	8	5	6	6	4	7	5	5	7	7	5	4	8	6	8	3	5	5	8	4
D_normandii_RZK8223	6	4	4	3	10	5	5	7	3	4	7	5	6	8	4	4	7	6	6	4	7	8	6	8	3	6	6	6	6	9	7	10
D_normandii_RZK8224	5	14	4	5	10	6	6	4	4	2	6	4	6	11	7	5	4	3	3	4	6	10	4	3	6	5	7	4	6	7
D_normandii_RZK8375	5	4	5	3	2	4	4	5	6	4	2	6	4	6	6	5	3	4	5	3	6	5	4	6	3	8	5	6	9	6
D_obtusa_RIR2441	8	6	7	7	8	8	8	9	7	6	4	6	8	5	7	8	8	6	8	10	9	10	7	9	8	6	5	8	7	6
D_obtusa_RIR2447	9	8	8	9	7	8	5	6	9	8	8	8	7	7	7	7	9	9	9	8	8	8	8	8	4	11	8	8	7	6
D_obtusa_RIR2834	7	7	7	7	8	5	6	5	5	4	7	9	8	8	7	8	7	6	6	6	6	6	7	8	8	8	5	6	7
D_obtusa_RIR2835	7	6	8	8	5	5	11	5	5	5	5	5	10	6	6	8	8	6	6	7	7	6	8	9	8	6	7	7	7	8
D_obtusa_RIR2842	7	7	5	6	6	8	7	7	8	8	7	8	7	5	7	8	7	6	5	5	6	6	6	6	6	6	4	8	9	12	11	14
D_orientalis_KAD0200	7	9	8	6	8	6	4	4	6	6	5	4	5	7	1	14	4	5	4	6	6	3	7	6	5	5	7	5	5	13	6	9
D_orientalis_RFN0021	8	5	8	7	8	12	9	10	8	6	9	8	10	6	6	8	9	9	10	8	7	8	15	7	9	6	7	7	7	3	7	7
D_orientalis_RFN0035	7	4	12	7	5	10	7	7	10	8	9	6	3	6	6	6	5	10	14	4	10	13	8	2	9	5	7	7	11	14	7	4
D_orientalis_RZK8269	5	6	5	6	7	6	6	5	13	7	5	6	7	3	4	4	7	5	7	6	7	6	6	7	6	6	7	6	6	6	4	5
D_orientalis_SAN0028	7	3	7	8	7	5	8	7	8	6	6	5	4	3	7	6	7	2	5	6	9	8	7	8	4	7	7	6	8	8	6	3
D_orientalis_SAN0031	6	4	7	4	8	7	9	6	7	7	7	8	8	7	8	5	6	6	10	5	7	7	7	6	7	8	6	6	7	8
D_pseudobaronii_ALR2439	3	13	15	6	17	4	15	4	6	15	18	9	12	13	2	19	8	15	4	3	11	9	5	4	12	5	2	6	6	16
D_pseudobaronii_ALR2440	21	13	6	15	6	10	19	10	3	5	4	16	12	4	8	5	14	3	13	5	18	14	13	4	23	13	5	17	14	8
D_pseudobaronii_ALR2446	15	4	11	8	11	12	5	9	7	12	8	4	13	13	13	11	10	10	11	15	9	32	9	7	11	11	11	25	10	16
D_pseudobaronii_RRN0026	5	3	18	14	7	10	11	14	7	12	3	5	9	8	15	10	20	12	27	27	15	5	3	6	6	15	3	14	30	12
D_pseudobaronii_RRN0027	5	10	3	5	6	13	7	6	12	11	7	7	6	6	6	5	7	14	21	16	8	17	7	8	9	6	6	9	5	5
D_purpurascens_RIR2410	11	13	17	15	9	15	6	32	12	12	14	12	25	12	9	12	12	6	14	14	9	9	14	21	9	12	11	13	12	14
D_purpurascens_RIR3335	8	4	7	9	13	13	11	12	5	5	7	14	16	4	8	4	5	14	13	13	6	8	15	6	13	7	5	2	7	6	9	8
D_purpurascens_RIR3336	7	11	9	10	9	6	15	18	4	10	13	14	14	15	17	5	5	3	9	13	12	16	14	3	13	6	5	12	16	12	8	13
D_purpurascens_RIR3337	13	6	3	7	7	7	7	6	6	7	11	6	4	3	2	9	7	12	8	9	6	16	5	6	6	7	6	9	12	10	15	4
D_purpurascens_ROZ0023	8	9	5	6	8	16	7	5	7	11	9	13	6	5	12	13	13	4	6	7	13	13	2	12	7	7	8	4	6	15	3	10
D_purpurascens_ROZ0024	6	10	9	4	2	15	13	16	14	5	8	10	8	12	12	12	11	4	6	10	11	12	7	11	11	21	11	14	8	10
D_razakamalalae_EME0023	5	5	6	4	5	5	5	7	5	4	3	6	4	5	5	6	5	4	7	5	4	5	5	6	4	4	4	5	6	7
D_razakamalalae_RFN0001	6	4	6	5	5	5	5	5	5	5	5	5	6	6	7	5	5	8	5	5	5	4	4	4	5	5	5	5	5
D_razakamalalae_RZK8035	7	5	6	6	8	6	7	5	6	7	5	7	8	7	6	8	6	7	7	4	5	4	5	7	8	7	8	7	6	7
D_razakamalalae_RZK8040	10	5	7	4	8	7	3	7	6	7	8	7	4	6	10	9	13	6	8	4	4	4	6	6	13	8	11	8	7	6
D_razakamalalae_SAN0023	6	2	5	7	4	8	3	7	6	7	4	3	8	5	4	7	2	7	6	9	10	7	6	7	6	4	2	3	7	10
D_razakamalalae_SAN0026	5	5	5	5	4	5	5	4	6	5	6	6	7	6	6	4	3	7	5	5	6	6	5	5	5	5	5	6	4	5
D_razakamalalae_SFR0255	3	4	5	3	4	3	4	4	2	6	5	3	2	2	4	4	4	6	4	4	3	4	4	3	3	7	4	4	5
D_urschii_ALR2443	4	6	6	5	6	5	6	5	14	5	6	4	5	7	6	9	7	8	8	7	8	12	12	4	5	9	8	9	5	4
D_urschii_RIR2458	6	4	6	6	7	7	6	7	7	5	7	4	9	8	9	7	4	6	6	7	5	6	7	5	6	7	6	5	9	6	8
D_urschii_RRN0043	7	6	5	6	4	8	5	5	7	7	4	3	5	4	7	6	6	6	5	7	6	11	6	6	7	6	6	5	5	6	2
D_urschii_RRN0044	3	4	6	11	9	12	4	5	4	11	9	12	2	7	8	7	10	7	4	7	10	2	6	5	5	5	10	5	7	8	16
D_urschii_RRN0045	7	5	7	5	8	6	4	7	7	5	5	12	7	6	9	4	6	5	6	6	4	7	8	4	5	5	8	7	5	3	3
[truncated: 12 more columns]

## Sheet: NSS
id	M1	M2	M3	M4	M5	M6	M7	M8	M9	M10	M11	M12	M13	M14	M15	M16	M17	M18	M19	M20	M21	M22	M23	M24	M25	M26	M27	M28	M29	M30	M31	M32	M33	M34	M35	M36	M37	M38	M39	M40	M41	M42	M43	M44	M45	M46	M47	M48	M49
D_abrahamii_KAD0058	5	6	6	5	6	6	6	6	6	6	6	6	4	7	6	5	5	6	6	4	6	5	6	5	6	5	5	7	7	7	7	7
D_abrahamii_KAD0059	4	4	4	4	4	4	4	4	4	5	4	5	4	4	5	4	4	5	5	4	5	4	4	4	6	5	5	6	6	6
D_abrahamii_KAD0060	6	6	6	5	6	6	6	6	5	5	6	6	6	5	6	6	5	6	6	6	6	6	5	5	6	6	6	4	5	6	6	6	6	6	6	6	6	6	6	6	6	6	6	6	6	6	6	6	6
D_abrahamii_RBE2765	6	6	6	6	6	6	7	6	7	6	7	7	5	7	7	6	6	7	6	6	6	6	7	6	7	8	7	7	6	6
D_abrahamii_RRN0033	6	6	7	6	7	7	7	7	7	7	7	5	7	7	7	7	7	6	6	6	7	6	7	6	7	6	6	6	6	5	6	6	6	6	6	6	6	6	6	6	6	6	6	6	6	6	6	6	6
D_abrahamii_RRN0034	7	7	7	7	7	7	7	7	7	7	7	7	7	7	7	7	7	7	7	7	7	7	7	7	7	7	7	6	6	5
D_abrahamii_SH0681	6	6	6	6	6	6	6	6	6	6	6	6	6	6	6	6	6	6	6	6	6	6	5	6	5	5	6	7	7	7
D_baronii_RBE2254	6	6	6	6	7	7	6	6	6	7	5	6	6	6	6	5	6	6	6	6	6	6	6	6	6	6	6	6	6	6
D_baronii_RBE2257	5	5	6	5	5	6	6	5	5	5	6	6	5	5	5	6	4	6	6	5	5	5	6	5	5	5	5	5	5	6
D_baronii_RBE2469	6	6	6	6	6	6	6	6	6	6	6	6	6	6	6	6	6	6	6	5	5	5	5	5	5	5	5	5	5	5
D_baronii_RBE2624	5	6	6	5	6	7	7	6	5	5	6	6	5	5	5	5	6	5	5	5	5	5	6	5	6	6	5
D_baronii_RNH1177	6	6	6	6	6	6	6	6	6	6	6	6	6	6	6	6	6	6	6	6	6	6	6	6	6	6	6
D_bathiei_KAD0143	5	5	5	5	5	5	5	5	5	5	5	5	5	5	5	5	5	5	5	5	5	5	5	5	5	5	5	5	5	5
D_bathiei_KAD0147	5	5	5	5	5	5	5	5	5	5	5	5	5	5	5	5	5	5	5	5	5	5	5	5	5	5	5	5	5	5
D_bathiei_KAD0150	5	5	5	5	5	5	5	5	5	5	5	5	5	5	5	5	5	5	5	5	5	5	5	5	5	5	5	5	5	5
D_bathiei_KAD0153	6	6	6	6	6	6	6	6	6	6	6	6	6	6	6	6	6	6	6	6	6	6	6	6	6	6	6	6	6	6
D_bathiei_RAV0097	5	5	5	5	5	5	5	5	5	5	5	5	5	5	5	5	5	5	5	5	5	5	5	5	5	5	5	5	5	5
D_chlorocarpa_CR7390	0	0	0	0	0	0	0	0	0	0	0	0	0	0	0	0	0	0	0	0	0	0	0	0	0	0	0	0	0	0
D_chlorocarpa_CR7422	0	0	0	0	0	0	0	0	0	0	0	0	0	0	0	0	0	0	0	0	0	0	0	0	0	0	0	0	0	0
D_chlorocarpa_RIR2903	0	0	0	0	0	0	0	0	0	0	0	0	0	0	0	0	0	0	0	0	0	0	0	0	0	0	0	0	0	0
D_chlorocarpa_RIR2904	0	0	0	0	0	0	0	0	0	0	0	0	0	0	0	0	0	0	0	0	0	0	0	0	0	0	0	0	0	0
D_chlorocarpa_SH0741	0	0	0	0	0	0	0	0	0	0	0	0	0	0	0	0	0	0	0	0	0	0	0	0	0	0	0	0	4	4	5
D_davidii_RIR3351	0	0	0	0	0	0	0	0	0	0	0	0	0	0	0	0	0	0	0	0	0	0	0	0	0	0	0	0	0	0
D_davidii_RIR3352	0	0	0	0	0	0	0	0	0	0	0	0	0	0	0	0	0	0	0	0	0	0	0	0	0	0	0	0	0	0
D_davidii_RIR3353	0	0	0	0	0	0	0	0	0	0	0	0	0	0	0	0	0	0	0	0	0	0	0	0	0	0	0	0	0	0
D_davidii_RIR3571	0	0	0	0	0	0	0	0	0	0	0	0	0	0	0	0	0	0	0	0	0	0	0	0	0	0	0	0	0	0
D_davidii_SH0733	0	0	0	0	0	0	0	0	0	0	0	0	0	0	0	0	0	0	0	0	0	0	0	0	0	0	0	0	0	0
D_greveana_RIR2421	7	7	7	7	7	6	7	7	7	7	6	6	7	7	7	7	6	7	7	7	7	7	7	7	7	7	7	7	7	6
D_greveana_RIR2913	6	6	6	6	6	6	7	6	6	7	7	6	6	6	7	6	6	6	6	7	7	6	6	6	6	6	6	7	6	7	6	6
D_greveana_RIR2914	6	6	6	6	6	6	6	7	6	6	6	7	6	6	6	6	6	7	7	7	7	7	6	7	6	6	6	7	7	6	6	6
D_greveana_RIR2915	7	7	6	6	7	6	6	6	6	6	7	8	6	7	6	6	7	7	5	7	6	5	5	5	6	7	7	6	6	6	7	6
D_greveana_RIR3214	7	7	7	6	7	6	6	7	7	7	6	6	6	7	6	7	7	6	7	7	7	6	7	7	7	7	7	7	7	6
D_greveana_RIR3215	6	7	7	7	7	7	7	7	7	7	7	7	7	7	7	7	7	7	7	7	7	7	7	7	7	7	7	7	7	7
D_greveana_RIR3219	6	7	7	7	7	7	7	7	7	7	7	7	7	7	7	7	7	7	7	7	7	7	7	7	7	7	7	7	7	7
D_greveana_SH0750	5	6	5	7	7	7	6	6	6	6	6	7	7	7	7	7	7	5	6	6	6	6	7	6	6	7	7	7	6	6	6	7
D_oronjiae_ANS0012	8	8	9	8	10	9	8	8	7	7	7	8	8	8	8	8	7	7	7	7	7	8	7	7	7	8	7
D_oronjiae_ANS0024	8	8	7	6	6	6	6	6	6	6	6	6	6	7	7	6	6	6	6	6	6	6	6	6	6	6	6	6	7	7
D_oronjiae_ANS0026	7	7	7	7	7	6	7	6	7	6	6	7	6	7	7	7	7	7	6	6	6	7	7	8	6	7	7
D_oronjiae_ANS0028	6	6	6	6	6	6	6	6	6	6	7	8	6	6	6	6	7	7	7	7	7	6	6	6	7	7	7
D_oronjiae_KAD0052	6	6	6	6	6	6	6	6	6	5	6	6	6	6	5	6	6	5	5	6	6	6	5	5	6	5	5	6	5	5
D_oronjiae_SH0690	7	7	7	7	7	7	7	7	7	7	7	7	7	7	7	7	7	7	7	7	7	7	6	7	7	7	6	7	7	7
D_lemurica_CR6514	6	5	6	5	4	6	5	5	5	5	5	4	6	5	6	5	6	5	4	6	5	5	5	5	5	4	6	5	5	6
D_lemurica_CR6519	6	7	7	6	7	6	6	6	7	7	7	7	6	7	7	7	7	7	7	7	7	6	7	7	7	7	7	6	7	6
D_lemurica_CR7441	10	13	15	11	14	13	12	8	9	11	12	10	11	9	7	9	10	7	9	10	12	14	13	15	11	9	8	7	9	8
D_lemurica_RIR3384	7	6	6	7	6	5	6	6	5	8	6	9	5	8	8	6	6	7	7	6	9	6	7	5	7	7	6	4	7	6
D_lemurica_RIR3387	8	7	6	5	7	7	5	5	7	7	8	7	6	7	7	6	8	6	7	8	8	5	6	6	7	5	7	8	7	8
D_lemurica_RIR3388	8	7	8	7	8	7	7	8	6	6	6	7	8	9	8	7	7	8	8	8	8	8	8	8	8	8	8	7	7	8
D_lemurica_RIR3419	7	8	6	6	8	7	9	6	4	8	7	7	9	8	6	6	7	5	6	7	7	6	8	7	7	8	8	8	9	8
D_lemurica_RIR3420	7	6	7	7	7	6	8	7	7	7	6	7	7	8	8	7	8	6	7	7	8	8	8	8	7	5	8	8	7	7
D_monticola_KAD0066	7	8	8	7	7	6	7	8	8	7	7	7	8	8	8	7	8	8	8	8	7	7	7	7	7	8	7	7	8	8
D_monticola_KAD0069	7	7	7	7	7	7	7	7	7	7	7	7	7	8	7	7	8	7	7	7	6	7	7	7	7	6	6	6	7	7
D_monticola_KAD0089	6	6	6	6	6	6	7	7	7	7	7	7	7	6	6	7	7	7	6	7	6	7	6	6	6	6	6	7	6	6
D_monticola_KAD0092	6	7	7	7	6	7	7	7	7	6	7	6	6	6	6	6	6	6	7	6	6	7	7	7	6	6	7	7	6	7
D_monticola_KAD0094	7	7	6	7	7	7	6	7	7	7	7	7	7	7	7	7	7	7	6	7	7	6	7	7	7	7	7	7	7	6
D_normandii_RBE2486	9	9	8	8	9	9	8	8	9	9	8	8	9	8	8	8	8	9	9	9	9	8	8	8	9	9	9	8	8	9
D_normandii_RBE2614	4	4	4	4	4	4	4	4	4	4	4	4	4	4	4	4	4	4	4	4	4	4	4	4	4	4	4	5	5	5
D_normandii_RZK8223	4	4	4	4	4	4	4	4	4	4	4	4	4	4	4	4	4	4	4	4	4	4	4	4	4	4	4	4	4	4
D_normandii_RZK8224	5	5	5	5	5	5	5	5	5	5	5	5	5	5	5	5	5	5	5	5	5	5	5	5	5	5	5	5	5	5
D_normandii_RZK8375	5	5	6	5	5	5	5	5	5	5	5	5	5	5	5	5	5	5	5	5	5	5	5	5	5	5	5	5	5	5
D_obtusa_RIR2441	7	7	7	7	7	7	6	7	7	7	7	7	6	7	7	7	7	7	7	7	7	7	7	7	6	7	7	7	7	7
D_obtusa_RIR2447	6	6	6	6	6	6	6	6	6	6	5	6	6	6	6	6	6	6	6	7	6	6	6	6	6	6	6	5	6	6
D_obtusa_RIR2834	7	7	6	6	7	7	7	7	7	7	7	7	7	7	7	7	7	7	7	7	7	7	7	7	7	7	7	7	7	7
D_obtusa_RIR2835	6	6	6	6	6	6	6	6	6	6	6	6	6	6	6	6	6	6	6	6	6	6	6	6	6	6	6	6	6	6
D_obtusa_RIR2842	6	6	6	6	6	5	5	5	6	6	6	5	5	5	5	5	5	6	5	6	5	5	6	5	5	5	5	5	6	6
D_orientalis_KAD0200	5	5	5	6	6	5	6	5	5	5	5	5	5	5	5	5	5	5	6	6	5	5	6	5	5	5	5	4	5	5
D_orientalis_RFN0021	7	6	6	7	7	7	7	7	7	7	7	7	7	7	7	7	7	7	7	7	7	7	7	6	7	7	7	7	7	7	7
D_orientalis_RFN0035	7	7	7	8	7	7	6	7	7	6	7	7	7	7	6	7	6	7	7	7	7	8	7	7	7	7	7	7	7	6	7
D_orientalis_RZK8269	7	7	6	6	7	7	7	7	7	7	7	6	7	7	7	7	7	7	7	7	6	7	7	7	7	7	7	7	7	7	7
D_orientalis_SAN0028	6	6	6	6	6	6	5	6	6	6	6	6	6	6	6	6	6	6	6	6	6	6	6	6	6	6	6	6	6	6	6
D_orientalis_SAN0031	5	6	6	5	6	6	6	6	6	6	6	6	6	6	6	5	6	6	6	6	6	5	6	6	6	6	6	6	6	6	6
D_pseudobaronii_ALR2439	5	5	6	6	6	6	6	6	6	6	6	6	6	6	6	6	5	6	6	6	6	6	6	6	6	6	6	6	6	6
D_pseudobaronii_ALR2440	5	5	5	5	5	5	5	5	5	5	5	5	5	5	5	5	5	5	5	5	5	5	5	5	5	5	5	5	5	5
D_pseudobaronii_ALR2446	7	6	6	6	6	6	6	7	6	6	6	6	6	6	6	6	6	6	6	6	6	6	6	6	6	6	6	7	6	6
D_pseudobaronii_RRN0026	5	5	5	5	5	5	5	5	5	5	5	5	5	5	5	5	5	5	5	5	5	5	5	5	5	5	5	5	5	5
D_pseudobaronii_RRN0027	7	7	7	7	7	7	7	7	7	7	7	7	7	7	7	7	7	7	7	7	7	7	7	7	7	7	7	7	7	7
D_purpurascens_RIR2410
D_purpurascens_RIR3335	0	0	0	0	0	0	0	0	0	0	0	0	0	0	0	0	0	0	0	0	0	0	0	0	0	0	0	0	0	0	0
D_purpurascens_RIR3336	0	0	0	0	0	0	0	0	0	0	0	0	0	0	0	0	0	0	0	0	0	0	0	0	0	0	0	0	0	0	0
D_purpurascens_RIR3337	6	6	7	6	7	7	6	7	7	6	6	6	6	6	6	6	6	6	6	6	6	6	6	6	6	7	7	6	6	6	6
D_purpurascens_ROZ0023	7	7	7	8	7	7	7	7	7	7	7	7	7	8	8	7	7	7	7	8	7	7	7	7	7	7	7	7	7	7	7
D_purpurascens_ROZ0024
D_razakamalalae_EME0023	6	7	6	7	7	5	5	6	6	7	6	6	6	6	7	6	6	6	6	6	6	7	7	6	6	7	7	6	6	6
D_razakamalalae_RFN0001	5	5	5	5	5	5	5	5	5	5	5	5	5	5	5	5	5	5	5	5	5	5	5	5	5	5	5	5	5	5
D_razakamalalae_RZK8035	6	6	6	6	6	6	6	6	6	6	6	5	6	6	6	6	6	6	6	6	5	6	6	6	6	6	6	6	6	6
D_razakamalalae_RZK8040	5	5	5	5	5	5	5	5	5	5	5	5	5	5	5	5	5	5	6	5	5	5	5	5	5	5	5	5	5	5
D_razakamalalae_SAN0023	5	5	5	5	6	5	5	5	5	5	5	5	5	5	5	5	5	5	5	6	5	5	5	5	5	5	5	5	5	5
D_razakamalalae_SAN0026	5	5	5	5	5	5	5	5	5	5	5	6	5	5	5	5	5	6	6	5	5	6	5	5	5	5	5	5	5	5
D_razakamalalae_SFR0255	5	6	5	5	5	5	5	6	6	6	5	6	5	5	5	6	5	5	5	5	5	5	5	5	5	6	5	5	5	5
D_urschii_ALR2443	6	7	7	7	7	6	6	5	4	6	5	6	6	8	5	7	7	7	7	6	7	7	7	6	7	6	6	6	6	5
D_urschii_RIR2458	5	5	5	5	5	5	5	5	6	6	5	6	6	6	5	6	5	6	6	6	6	5	6	4	5	6	6	4	6	4
D_urschii_RRN0043	7	7	7	7	7	7	7	7	7	7	7	7	7	7	7	7	7	8	7	7	7	7	7	7	7	7	7	7	7	7
D_urschii_RRN0044	8	8	7	8	7	8	8	8	8	8	8	8	8	8	8	8	8	8	8	8	8	8	7	7	8	8	8	8	8	8
D_urschii_RRN0045	7	7	7	7	7	7	7	7	7	7	7	7	7	7	7	7	7	7	7	7	7	7	7	7	7	7	7	7	7
[truncated: 16 more columns]

## Sheet: RW
id	M1	M2	M3	M4	M5	M6	M7	M8	M9	M10	M11	M12	M13	M14	M15	M16	M17	M18	M19	M20	M21	M22	M23	M24	M25	M26	M27	M28	M29	M30	M31	M32	M33	M34	M35	M36	M37	M38	M39	M40	M41	M42	M43	M44	M45	M46	M47	M48	M49
D_abrahamii_KAD0058	2	2	2	2	2	2	1	1	2	1	2	1	1	2	2	3	2	2	2	2	1	1	1	2	2	1	1	2	2	2
D_abrahamii_KAD0059	2	2	2	2	3	4	1	2	2	2	2	3	3	2	2	2	2	2	2	2	2	2	2	2	2	2	2	2	1	3
D_abrahamii_KAD0060	2	2	2	2	2	1	2	2	2	2	1	1	2	2	2	1	2	2	2	3	2	2	2	2	2	2	2	2	2	2	2	2	2	1	2	1	1	1	2	1	1	2	2	2	1	1	3	2	2
D_abrahamii_RBE2765	2	2	2	2	1	2	2	1	2	2	2	2	1	1	1	1	2	1	3	3	2	2	2	2	1	2	1	1	3	3
D_abrahamii_RRN0033	1	1	1	1	1	1	2	2	2	1	1	1	1	1	2	1	1	1	1	2	1	2	1	2	2	2	1	2	1	1	2	2	2	2	2	2	1	2	2	2	2	2	2	2	2	1	2	2	2
D_abrahamii_RRN0034	1	1	1	1	1	2	1	2	1	1	1	1	2	1	1	2	2	2	2	1	1	1	2	2	1	1	1	2	2	3
D_abrahamii_SH0681	2	2	2	2	1	1	2	2	1	1	2	1	2	1	1	1	1	1	1	2	2	2	3	1	2	1	2	2	1	2
D_baronii_RBE2254	1	1	1	2	1	1	1	1	1	1	1	1	2	1	2	2	1	1	1	1	1	1	1	1	1	1	1	1	1	1
D_baronii_RBE2257	1	1	1	1	1	2	1	1	1	1	1	1	1	1	1	1	2	1	2	1	1	1	1	1	1	1	1	1	2	1
D_baronii_RBE2469	2	1	1	1	1	1	1	1	2	2	2	1	2	1	1	2	1	1	1	2	2	1	1	1	1	2	2	2	2	1
D_baronii_RBE2624	2	2	2	1	1	1	1	1	1	1	1	1	1	2	1	1	2	1	1	1	1	1	1	1	1	1	1	1	1	1
D_baronii_RNH1177	2	1	2	2	2	2	2	3	2	2	2	2	2	1	3	2	2	2	2	1	3	1	2	2	2	2	1	3	1
D_bathiei_KAD0143	3	2	3	3	2	2	1	2	1	3	3	3	3	2	1	2	3	3	3	1	2	1	2	3	2	3	2	2	1	3
D_bathiei_KAD0147	2	2	2	1	3	2	2	3	2	1	3	2	2	2	2	3	1	3	2	2	3	2	1	1	2	2	2	3	3	1
D_bathiei_KAD0150	2	2	2	1	2	2	3	2	2	2	1	1	2	2	1	2	1	1	2	3	2	1	2	2	1	2	2	1	1	1
D_bathiei_KAD0153	1	1	1	3	2	1	2	1	1	2	1	1	1	2	1	1	1	3	1	1	1	2	3	1	2	2	1	1	2	3
D_bathiei_RAV0097	2	2	2	2	2	2	1	1	2	2	2	2	1	1	2	2	2	2	2	2	2	2	2	2	2	2	2	1	2	2
D_chlorocarpa_CR7390	3	2	1	3	3	2	3	2	3	1	3	2	3	1	3	2	1	2	3	3	3	1	2	2	3	2	3	3	2	2
D_chlorocarpa_CR7422	2	2	2	2	2	2	3	1	2	3	2	2	2	1	2	1	3	2	2	1	3	3	2	3	3	3	3	3	2	2
D_chlorocarpa_RIR2903	2	2	2	2	3	3	2	2	2	2	2	2	2	2	2	2	1	2	2	2	2	3	2	2	2	3	2	3	2	2
D_chlorocarpa_RIR2904	2	2	2	1	2	2	1	2	1	2	2	2	2	2	2	1	2	1	1	1	1	2	2	2	2	1	2	2	2	3
D_chlorocarpa_SH0741	2	2	2	2	2	2	3	2	2	1	2	2	2	2	2	2	3	2	2	2	2	2	1	1	2	2	3	2	2	2
D_davidii_RIR3351	2	1	2	3	2	2	2	1	2	1	2	1	2	2	2	3	2	2	1	2	1	2	2	1	3	2	1	2	2	2
D_davidii_RIR3352	2	2	2	3	2	2	1	1	2	2	1	2	2	2	1	3	2	2	3	1	1	1	2	2	3	2	2	2	1	2
D_davidii_RIR3353	1	2	2	2	2	1	1	2	1	3	2	2	2	1	2	2	1	1	3	2	1	3	2	1	2	2	2	1	2	2
D_davidii_RIR3571	1	1	1	1	1	1	2	1	1	1	2	1	1	1	2	1	1	1	2	1	1	2	1	2	1	1	1	1	1	2
D_davidii_SH0733	2	2	2	1	2	1	2	1	2	2	2	3	2	1	2	2	2	1	2	1	2	1	2	2	1	2	2	1	2	1
D_greveana_RIR2421	2	2	2	2	1	2	1	2	2	2	1	2	2	2	2	1	2	2	2	2	2	2	1	2	2	1	2	1	2	2	2	2
D_greveana_RIR2913	2	2	2	2	2	2	2	1	2	2	2	2	2	2	2	2	1	2	2	2	2	2	2	1	2	2	2	2	2	2	2	2
D_greveana_RIR2914	1	2	2	2	2	1	2	2	2	2	2	2	2	2	1	2	2	2	2	2	2	2	2	2	2	2	2	1	2	2	2	1
D_greveana_RIR2915	2	2	1	1	2	2	2	2	1	2	2	2	2	1	2	1	2	1	2	2	1	2	1	1	2	2	2	1	2	1	2	2
D_greveana_RIR3214	2	2	2	2	2	2	1	2	2	2	2	2	1	2	2	2	2	2	1	2	2	2	2	2	2	1	2	2	2	2	2	2
D_greveana_RIR3215	2	2	2	2	1	2	2	2	1	2	2	2	2	2	2	2	1	2	2	2	2	1	2	1	2	1	2	2	2	2	2	2
D_greveana_RIR3219	2	2	2	1	2	2	2	2	2	1	2	2	2	1	2	2	2	2	1	2	1	2	2	2	2	1	2	2	1	2	2	2
D_greveana_SH0750	2	1	2	2	2	2	2	2	2	2	1	2	2	1	2	2	1	1	1	1	2	2	2	1	2	1	2	2	2	2	2	1
D_oronjiae_ANS0012	1	1	1	2	1	3	2	1	1	1	1	1	2	3	1	1	1	2	1	1	1	2	1	2	1	1	2	2	1	1
D_oronjiae_ANS0024	1	1	1	1	2	1	3	2	2	1	2	1	1	2	3	1	1	1	2	2	1	1	1	1	1	2	1	2	1	1
D_oronjiae_ANS0026	2	2	2	1	1	2	1	2	1	3	1	2	2	2	1	1	2	1	2	1	1	2	2	2	1	1	1	2	1	1
D_oronjiae_ANS0028	1	1	2	1	1	1	1	2	1	2	1	1	1	1	1	2	2	2	2	2	2	2	1	1	1	2	2	2	2	2
D_oronjiae_KAD0052	2	2	2	1	1	2	3	2	2	1	2	2	3	2	2	2	2	3	1	2	2	2	2	2	2	1	2	2	2	1
D_oronjiae_SH0690	1	1	2	1	1	1	1	1	2	2	1	2	2	1	1	2	1	1	1	2	2	2	1	1	1	2	2	2	2	2
D_lemurica_CR6514	2	1	2	1	1	1	2	2	2	1	2	2	1	2	2	2	2	1	3	1	1	1	2	1	2	2	2	1	1	1
D_lemurica_CR6519	1	1	1	1	1	1	1	1	1	2	2	1	1	1	1	1	2	1	1	1	2	1	1	1	1	2	1	2	1	1	1
D_lemurica_CR7441	2	2	1	2	1	2	1	2	2	1	2	1	2	2	2	1	2	2	1	2	1	2	1	2	2	2	1	2	1	1
D_lemurica_RIR3384	1	1	2	1	2	2	1	1	1	2	1	2	1	2	2	2	2	1	1	1	2	2	1	1	2	1	2	1	2	1
D_lemurica_RIR3387	1	1	2	2	1	1	1	1	2	1	1	2	1	1	2	2	1	1	1	2	1	1	1	2	1	2	2	1	1	1
D_lemurica_RIR3388	1	1	1	2	2	1	1	1	2	1	2	1	2	1	1	1	2	1	2	1	1	1	2	1	1	2	1	1	2	1
D_lemurica_RIR3419	2	2	1	2	2	2	1	1	1	2	1	2	2	1	2	1	2	1	1	2	2	1	1	2	1	2	2	1	2	1
D_lemurica_RIR3420	1	1	1	1	1	2	1	1	2	2	1	1	1	1	1	2	1	2	1	1	2	1	1	1	1	1	2	1	1	1
D_monticola_KAD0066	2	2	2	2	2	2	2	2	3	2	3	2	2	2	2	2	2	2	2	2	1	2	2	2	3	2	2	3	2	2	2	2
D_monticola_KAD0069	2	3	3	2	3	3	2	2	2	2	2	2	2	2	3	2	2	2	2	2	3	3	2	2	2	2	3	2	2	2	3	2
D_monticola_KAD0089	2	2	2	2	3	2	2	2	3	2	2	1	2	2	2	3	3	2	2	1	2	2	2	2	2	3	2	3	2	2	2	2
D_monticola_KAD0092	2	2	2	2	3	2	2	3	2	2	2	2	2	2	2	3	3	2	2	3	2	2	2	2	2	3	2	2	2	3	2	2
D_monticola_KAD0094	2	2	2	2	2	2	2	1	2	2	2	2	3	2	1	2	2	1	2	2	2	3	2	1	1	2	1	2	2	2	3	2
D_normandii_RBE2486	1	1	1	1	1	1	1	2	1	1	1	2	1	1	1	2	1	1	1	2	1	2	1	1	1	1	1	1	2	1
D_normandii_RBE2614	2	1	1	1	1	1	1	2	1	1	1	2	1	1	1	1	1	1	1	1	1	1	1	1	1	1	1	2	1	1
D_normandii_RZK8223	1	1	2	1	1	1	1	1	1	1	1	2	1	2	1	2	1	2	1	1	1	1	1	1	1	2	2	2	2	1
D_normandii_RZK8224	2	1	1	1	1	2	2	2	2	2	2	1	2	1	1	1	2	1	2	2	2	2	1	1	1	1	1	2	2	2
D_normandii_RZK8375	1	1	1	1	1	1	1	2	2	1	1	1	1	1	1	2	1	2	1	1	1	1	2	2	1	2	1	1	2	1
D_obtusa_RIR2441	1	1	1	1	1	1	1	1	1	1	1	1	1	1	1	1	1	1	1	1	1	1	1	1	1	1	1	1	1	1
D_obtusa_RIR2447	1	1	1	1	1	1	1	1	1	1	1	1	1	1	1	1	1	1	1	1	1	1	1	1	1	1	1	1	1	1
D_obtusa_RIR2834	1	1	1	1	1	1	1	1	2	1	1	1	1	1	1	1	2	1	1	1	1	1	1	1	2	1	1	1	1	1
D_obtusa_RIR2835	1	1	1	1	1	1	2	1	1	2	1	1	1	1	2	1	1	1	2	2	2	1	1	1	1	1	1	1	1	1
D_obtusa_RIR2842	2	1	1	1	2	1	1	1	1	1	1	1	1	2	1	1	1	2	1	1	1	1	2	1	1	1	2	1	1	1
D_orientalis_KAD0200	2	2	2	2	2	2	1	1	2	1	2	2	1	1	3	2	2	2	2	1	2	1	2	2	2	2	2	2	2	1
D_orientalis_RFN0021	2	2	2	1	2	2	2	2	1	2	2	1	2	2	1	2	2	2	2	2	1	1	1	1	2	2	1	1	1	1
D_orientalis_RFN0035	1	2	2	1	1	1	2	2	2	2	1	1	2	2	1	2	2	2	2	1	2	2	1	1	1	1	1	1	1	2
D_orientalis_RZK8269	2	2	1	2	2	3	1	2	2	2	1	1	1	2	1	2	2	2	2	1	2	1	2	2	2	2	2	1	2	1
D_orientalis_SAN0028	1	1	1	1	1	1	1	1	1	1	1	1	1	1	1	1	1	1	1	1	1	1	1	1	1	1	1	1	1	1
D_orientalis_SAN0031	1	1	1	1	1	1	2	2	1	1	1	1	1	1	2	2	1	1	1	1	2	1	2	2	2	1	1	1	1	2
D_pseudobaronii_ALR2439	2	2	1	2	1	2	2	3	2	2	1	2	2	3	2	2	2	3	1	2	2	2	1	2	3	2	1	2	2	3
D_pseudobaronii_ALR2440	2	1	3	2	2	2	1	2	2	2	1	3	2	3	1	2	2	2	1	2	2	1	2	2	1	1	1	1	2	2
D_pseudobaronii_ALR2446	2	2	2	2	2	2	2	2	3	1	2	2	2	2	1	2	2	2	3	2	2	2	3	2	2	2	2	2	2	2
D_pseudobaronii_RRN0026	1	2	1	2	2	1	1	2	2	1	2	1	2	1	2	1	2	2	2	2	2	2	1	1	2	2	2	1	1	1
D_pseudobaronii_RRN0027	2	2	2	1	3	2	3	2	1	3	2	3	1	3	2	2	2	2	1	2	1	3	2	3	2	2	2	3	1	3
D_purpurascens_RIR2410	2	2	2	2	2	2	2	2	2	1	1	2	2	2	2	2	1	2	2	2	2	2	1	2	2	2	2	2	2	2
D_purpurascens_RIR3335	1	1	1	2	1	2	1	1	2	1	2	2	1	2	1	1	1	2	1	1	2	1	1	3	1	2	1	1	1	2
D_purpurascens_RIR3336	2	2	2	2	2	1	1	2	2	2	1	2	2	2	1	2	3	2	2	2	1	2	2	1	2	1	2	2	1	3
D_purpurascens_RIR3337	2	2	1	2	1	2	1	2	1	3	3	1	2	2	2	2	1	2	1	1	2	3	2	1	1	1	2	1	1	1
D_purpurascens_ROZ0023	2	2	2	1	2	2	2	1	1	2	2	3	2	2	2	2	2	2	1	2	3	2	1	2	3	3	2	2	2	1
D_purpurascens_ROZ0024	2	2	2	3	2	2	1	1	2	2	3	1	2	3	2	3	2	2	2	3	2	2	1	2	2	2	1	2	2	2
D_razakamalalae_EME0023	1	1	1	1	1	1	1	1	1	1	1	1	1	1	1	1	1	1	1	1	1	1	1	1	1	1	1	1	1	1
D_razakamalalae_RFN0001	1	1	1	1	1	1	1	1	1	1	1	1	1	1	1	1	1	1	1	1	1	1	1	1	1	1	1	1	1	1	1	1
D_razakamalalae_RZK8035	1	1	1	1	1	1	2	1	1	1	2	1	1	1	2	1	1	1	1	1	1	2	2	1	1	1	1	2	1	1
D_razakamalalae_RZK8040	1	1	1	1	1	1	1	1	1	1	2	1	1	1	1	1	1	2	1	2	1	1	1	1	1	1	1	1	1	2
D_razakamalalae_SAN0023	1	1	1	1	1	1	1	1	1	1	1	1	1	1	1	1	1	1	1	1	1	1	1	1	1	1	1	1	1	1
D_razakamalalae_SAN0026	1	1	1	1	1	1	1	2	1	1	1	1	1	1	2	1	1	1	1	1	1	1	1	2	1	1	1	1	1	1
D_razakamalalae_SFR0255	1	1	1	1	1	1	1	1	1	1	1	1	1	1	1	1	1	2	1	1	1	1	1	1	2	1	1	1	1	1
D_urschii_ALR2443	2	2	2	2	2	2	2	1	3	3	2	2	2	2	2	1	2	2	2	2	2	2	2	2	1	1	2	2	2	2
D_urschii_RIR2458	2	2	2	2	2	2	2	1	2	1	2	1	2	2	2	2	2	2	2	2	2	2	2	2	2	1	2	2	1	2
D_urschii_RRN0043	2	2	2	1	1	1	1	1	1	2	2	2	2	1	2	2	2	1	1	2	2	1	1	1	1	2	2	1	3	2
D_urschii_RRN0044	2	2	2	2	1	1	3	1	2	1	1	3	2	1	2	2	1	1	2	1	2	2	2	2	1	1	3	2	1	2
D_urschii_RRN0045	1	1	2	2	1	2	2	1	2	2	1	1	2	2	1	1	2	2	2	1	1	2	2	1	1	1	1	2	2	1
[truncated: 11 more columns]

## Sheet: TVD_RingPorousEW
id	M1	M2	M3	M4	M5	M6	M7	M8	M9	M10	M11	M12	M13	M14	M15	M16	M17	M18	M19	M20	M21	M22	M23	M24	M25	M26	M27	M28	M29	M30	M31	M32
D_abrahamii_KAD0058	200	170	120	130	170	200	160	130	120	160	130	150	100	150	130
D_abrahamii_KAD0059	170	170	180	180	190	200	200	200	200	200	210	220	230	250	260
D_abrahamii_KAD0060	170	40	160	110	110	150	180	100	140	105	120	150	200	190	110
D_abrahamii_RBE2765	160	220	120	120	190	250	220	170	200	100	140	270	300	120	180	250
D_abrahamii_RRN0033	180	120	180	180	120	180	120	200	160	90	160	160	200	180	200	170	180	170	180	140	150	200	140	150	210	190	210	120	150	160
D_abrahamii_RRN0034	150	140	120	160	120	210	120	130	180	160	170	170	170	160	140	130	160	160	200	160	140	220	140	160	100	130	150	130	140	140
D_abrahamii_SH0681	100	100	100	110	110	120	120	120	130	130	130	130	130	140	150
D_baronii_RBE2254
D_baronii_RBE2257
D_baronii_RBE2469
D_baronii_RBE2624
D_baronii_RNH1177
D_bathiei_KAD0143
D_bathiei_KAD0147
D_bathiei_KAD0150
D_bathiei_KAD0153
D_bathiei_RAV0097
D_chlorocarpa_CR7390	150	160	280	110	150	130	190	210	130	110	150	140	120	170	160	150	110	150	100
D_chlorocarpa_CR7422	140	140	180	250	220	200	200	180	190	200	150	160	170	210	260	220	190	220	220	180	210	180	190	270	210	170	180	180	220
D_chlorocarpa_RIR2903	170	115	115	120	120	120	120	135	135	135	135	135	170	175	185	185	205	205	235	250
D_chlorocarpa_RIR2904	135	125	135	273	125	136	105	105	187	135	103	220	103	100	120	135	118	237	150	205	100	275	140
D_chlorocarpa_SH0741	170	140	150	180	110	160	210	110	140	200	150	130	210	150	190	120	230	170	150	160	210	130
D_davidii_RIR3351	140	140	120	140	150	160	150	150	130	100	130	120	140	200	130	140	110	100	90	100	110	100	140	120	140	140	140	70	150
D_davidii_RIR3352	130	200	210	100	150	130	130	100	120	100	120	150	120	130	120	170	140	90	70	150	130	160	160	140	140	150	130	170	150	210
D_davidii_RIR3353	140	150	100	100	150	160	170	180	140	180	140	120	100	100	90	220	140	130	130	130	130	130	130	130	130	130	130	130	130
D_davidii_RIR3571
D_davidii_SH0733	180	150	110	150	160	180	160	130	140	150	150	130	90	120	120	140	190	150	130	140
D_greveana_RIR2421	160	250	180	150	200	210	180	230	230	160	270	190	260	190	160	180	240	140	320	260	210	350	300	220	270	210	190	230	150	160
D_greveana_RIR2913	220	360	320	360	260	210	260	250	290	270	270	320	260	270	220	220	200	215	300	250	340	340	250	270	240	270	310	210	200	300	210	200
D_greveana_RIR2914	170	200	210	200	190	210	230	180	140	200	130	200	180	210	180	190	170	200	190	210	270	250	170	250	190	190	200	170	250	170	170	200
D_greveana_RIR2915	110	130	110	110	125	130	140	120	150	125	140	130	100	115	165	140	150	250	120	120	125	145	140	140	130	140	160	170	160	140	160	260
D_greveana_RIR3214	220	280	230	140	220	190	250	260	210	180	170	160	150	200	180	140	200	250	190	160	240	270	210	140	210	240	230	210	240	200
D_greveana_RIR3215	300	240	260	200	260	180	200	300	290	280	290	310	240	200	240	230	190	180	290	300	300	290	140	260	300	290	170	170	160	260
D_greveana_RIR3219	220	180	210	230	300	150	190	240	200	160	180	260	220	240	250	230	290	210	290	310	280	210	220	230	220	260	190	220	310	190
D_greveana_SH0750	110	130	120	130	110	120	100	120	110	160	150	110	120	160	180	110	150	160	170	180	190	150	130	160	160	160	140	110	140	110	140	110
D_oronjiae_ANS0012
D_oronjiae_ANS0024
D_oronjiae_ANS0026
D_oronjiae_ANS0028
D_oronjiae_KAD0052	140	160	180	170	230	150	200	170	160	190	230	185	130	170	115	180	160	120	110	230	170	240	130	160	190	210	170	120	180	190
D_oronjiae_SH0690
D_lemurica_CR6514	160	120	200	150	180	120	120	100	120	120	110	120	120	160	120	120	200	130	180	180	190	180	120	200	100	120	130	140	160	130
D_lemurica_CR6519	110	100	100	110	100	100	110	100	100	110	110	100	100	100	100	110	100	100	110	100	100	110	100	100	110	100	100	110	100	100
D_lemurica_CR7441	150	120	180	140	120	100	180	100	130	140	190	140	150	180	150	130	100	130	120	110	140	170	140	150	180	130	100	200	130	140
D_lemurica_RIR3384	150	90	110	100	100	80	120	200	90	90	150	110	100	70	80	65	110	50	75	100	100	120	80	60	90	110	115	90	100	70
D_lemurica_RIR3387	150	90	70	50	150	70	100	90	70	120	90	80	70	80	70	70	90	60	65	50	70	40	55	100	100	80	50	50	40	80
D_lemurica_RIR3388	80	70	100	80	70	100	70	70	100	80	100	100	60	75	70	60	85	40	70	80	65	70	120	110	80	90	60
D_lemurica_RIR3419	60	60	70	70	60	65	65	70	70	70	60	110	90	90	90	60	40	60	75	60	60	110	100	65	70	75	50	50	90	60
D_lemurica_RIR3420	140	120	120	70	70	70	80	100	105	90	60	130	90	70	80	80	70	90	90	100	80	100	90	70	100	120	100	70	100	150
D_monticola_KAD0066	250	200	150	140	200	200	220	130	130	280	170	170	100	110	90	150	140	140	160	130	110	150	140	150	180	130	140	140	200	140	130	180
D_monticola_KAD0069	240	170	160	180	130	90	160	110	150	120	130	110	110	180	180	180	130	160	160	110	150	160	130	100	140	100	210	80	100	100	110
D_monticola_KAD0089	255	170	140	110	160	140	140	200	160	110	110	160	110	200	160	180	140	220	200	220	170	160	100	80	100	150	200	130	110	180	170	120
D_monticola_KAD0092	210	210	210	150	150	170	150	190	100	150	170	90	120	120	90	140	120	160	110	160	130	140	110	170	140	150	230	210	80	180	160	150
D_monticola_KAD0094	180	140	200	170	140	170	190	190	110	150	140	280	130	160	100	120	120	240	210	280	170	180	160	150	240	140	120	190	150	160	160	200
D_normandii_RBE2486
D_normandii_RBE2614
D_normandii_RZK8223
D_normandii_RZK8224
D_normandii_RZK8375
D_obtusa_RIR2441
D_obtusa_RIR2447
D_obtusa_RIR2834
D_obtusa_RIR2835
D_obtusa_RIR2842
D_orientalis_KAD0200	240	290	160	100	130	130	130	270	320	310	310	250	260	240	190	130	340	170	250	290	350	290	320	300	150	290	300	140	210	150
D_orientalis_RFN0021
D_orientalis_RFN0035
D_orientalis_RZK8269	320	190	160	270	170	140	230	290	290	240	300	130	320	105	300	200	310	160	300	290	150	110	330	340	200	300	150	300	270	130
D_orientalis_SAN0028
D_orientalis_SAN0031
D_pseudobaronii_ALR2439	120	160	150	170	165	150	120	165	160	115	130	130	110	140	110	100	105	100	150	110	120	100	90	100	70	170	110	140	130	100
D_pseudobaronii_ALR2440	210	240	200	230	210	130	210	140	210	110	140	130	210	200	190	290	230	200	250	200	230	200	270	270	240	240	200	260	250	270
D_pseudobaronii_ALR2446	120	100	110	150	120	90	160	120	80	130	120	100	130	80	140	150	100	160	100	180	160	200	150	130	100	130	160	140	250	170
D_pseudobaronii_RRN0026	220	170	170	270	240	180	130	200	140	190	190	230	180	260	150	140	170	310	280	230	140	170	190	200	200	160	270	210	200	190
D_pseudobaronii_RRN0027	200	190	130	170	220	140	140	160	140	90	170	130	220	270	110	150	170	160	150	140	190	220	140	100	200	190	210	150	110	250
D_purpurascens_RIR2410	210	280	180	190	390	280	180	230	300	290	250	230	260	190	190	190	330	250	220	190	180	230	350	250	270	300	260	230	300	230
D_purpurascens_RIR3335	220	240	200	200	270	150	170	150	210	250	180	210	170	210	180	180	200	210	250	190	270	200	220	230	270	170	220	200	150	250
D_purpurascens_RIR3336	220	220	150	120	260	170	180	170	110	130	180	170	130	190	300	200	250	160	220	260	120	130	90	120	110	180	90	260	170	180
D_purpurascens_RIR3337	220	270	210	310	180	240	220	200	300	180	210	170	240	170	170	110	130	100	140	200	230	200	310	210	210	200	220	250	170	250
D_purpurascens_ROZ0023	320	260	270	170	220	200	290	280	230	340	310	220	230	320	230	230	200	260	240	330	280	220	260	310	190	230	280	230	210	190
D_purpurascens_ROZ0024	260	210	180	200	140	270	250	230	160	270	270	250	270	310	220	310	280	300	290	220	270	240	170	200	190	260	240	280	280	250
D_razakamalalae_EME0023
D_razakamalalae_RFN0001
D_razakamalalae_RZK8035
D_razakamalalae_RZK8040
D_razakamalalae_SAN0023
D_razakamalalae_SAN0026
D_razakamalalae_SFR0255
D_urschii_ALR2443	100	200	100	70	200	80	80	140	140	120	120	160	160	120	130	180	140	80	130	80	120	110	180	110	180	140	150	140	120	130
D_urschii_RIR2458	200	230	210	170	210	140	130	140	200	200	90	140	140	140	110	150	150	160	120	100	120	120	70	100	180	190	150	180	200	150
D_urschii_RRN0043	220	160	180	180	190	210	210	200	120	160	300	220	280	200	220	140	220	250	250	160	300	220	280	220	160	180	180	190	150	300
D_urschii_RRN0044	220	270	270	260	270	200	220	240	230	170	230	200	260	230	250	250	150	160	170	260	170	270	230	270	220	200	200	110	200	200
D_urschii_RRN0045	140	190	150	150	230	120	140	110	120	190	160	160	130	100	150	170	210	250	180	150	180	150	130	200	205	180	160	170	190	190

[truncated: 2 more sheets: TVD_RingPorousLW, TVD_DiffusePorous]
